# Supplementary material for: A ring-locking strategy to enhance the chemical and photochemical stability of A–D–A-type non-fullerene acceptors
Source: Royal Society of Chemistry journal article supplement (doi:10.1039/d0ta09924d), 2020-11-25
Supplement: d0ta09924d1.pdf [file d0ta09924d1.pdf]

## Supporting Information

### A Ring-locking Strategy to Enhance the Chemical and Photochemical Stability of A-D-A-type Non-Fullerene Acceptors

Hongtao Liu,<sup>‡a</sup> Wen Wang,<sup>‡b</sup> Yinhua Zhou<sup>b</sup> and Zhong'an Li<sup>\*a</sup>

<sup>a</sup> Key Laboratory for Material Chemistry of Energy Conversion and Storage, Ministry of Education, School of Chemistry and Chemical Engineering, Huazhong University of Science and Technology, Wuhan, 430074, PR China

E-mail: lizha@hust.edu.cn

<sup>b</sup> Wuhan National Laboratory for Optoelectronics and School of Optical and Electronic Information Huazhong University of Science and Technology Wuhan 430074, PR China

<sup>‡</sup>H. Liu and W. Wang contributed this work equally.

## 1. Experimental Section

### 1.1. Instrumentations

<sup>1</sup>H NMR and <sup>13</sup>C NMR spectra were measured using a Bruker 400 and 600 MHz instrument spectrometers. High-resolution mass spectrometry (HRMS) was performed by using Bruker Daltonics instrument, Solarix 7.0T. MALDI-TOF MS analysis was performed on an AB SCIEX MALDI TOF/TOF<sup>TM</sup> 5800 system (Applied Biosystems, Foster City, CA, USA). Cyclic voltammetry (CV) was measured on a CHI600E electrochemical analyzer (CH Instruments, Inc., China) using a conventional three-electrode cell with a platinum disk electrode (2 mm in diameter) as the working electrode, a platinum wire (0.5 mm in diameter), an Ag/AgCl as the reference electrode in an 0.1 M electrolyte containing tetrabutylammonium hexafluorophosphate in dichloromethane at a scan rate of 100 mV s<sup>-1</sup>. Potentials were referenced to the ferrocenium/ferrocene (FeCp<sub>2</sub><sup>+/0</sup>) couple by using ferrocene as an external standard. The HOMO/LUMO energy levels are calculated according to the equation of  $E_{\text{HOMO/LUMO}} = -(E_{\text{ox/red}} + 4.8)$  eV. For HOMOs, they are mainly calculated based on the average potentials from the quasi-reversible oxidation peak, except those of IDT-R and IDTT-R based on the onset of first oxidation peak. For LUMOs, all values are calculated based on the onset of first reduction peak. Differential pulse voltammetry (DPV) was measured on a

CHI760E electrochemical analyzer (CH Instruments, Inc., China) using a same three-electrode cell as CV, and the  $E_{\text{ox/red}}$  are obtained from the peak potential of the first oxidation/reduction wave.<sup>1</sup> UV–Vis–NIR absorption spectra were collected using a PerkinElmer LAMBDA 750S UV-VIS-NIR spectrophotometer. Current density-voltage ( $J$ - $V$ ) characteristics of the cells were measured using a Keithley 2400 SourceMeter. The cells were illuminated through an aperture area of 4.1 mm<sup>2</sup> from a 100 mW/cm<sup>2</sup> AM1.5 solar simulator (Newport, ORIEL, Sol3A, 450 W xenon lamp), and the device photostability was also measured under the same light sources. The photostability of solution and film was tested by using a solar light simulator (CEL-S500L, Beijing China Education Au-light Co., Ltd) based on a xenon lamp (500W).

## 1.2. Photovoltaic device fabrication

Device structure of organic solar cell with metal electrode is: glass/ITO/ZnO/donor:acceptor/MoO<sub>3</sub>/Ag. ITO glass substrates were cleaned in the ultrasound baths for 15 min with soapy water, deionized water, acetone and isopropanol, respectively. ITO substrates were blown dry with a nitrogen gun and treated by air plasma for 3 min. ZnO precursor solution was spin-coated on the ITO glass at 3500 rpm for 40 s, and then annealed at 200 °C for 15 min. The active layer was deposited on the ZnO at optimized speed for 45 s. The annealed process was at optimized temperature for 10 min in a N<sub>2</sub>-filled glovebox. The detail preparation parameters of active layer were displayed in **Table S4**. The top electrode MoO<sub>3</sub> (7 nm)/Ag (70 nm) was deposited thermal evaporation system (Mini-Spectros, Kurt J. Lesker) at a base pressure of  $2 \times 10^{-6}$  Torr. The effective area was 4.1 mm<sup>2</sup>.

## 1.3. Materials and Synthesis

2-(1,1-dicyanomethylene)rhodanine (RCN)<sup>2</sup>, thiobarbituric acid (TBA)<sup>3</sup>, and 3-Bromocyclohex-2-enon<sup>4</sup> were synthesized according to the previous literatures. IDT-CHO,

IDTT-CHO, IDT-tin, and IDTT-tin were purchased from Derthon Optoelectronic Materials Science Technology Co., LTD. PBDB-T, PBDB-T-2F, PTB7-Th, ITIC, IT-4F, and IT-M were purchased from Solarmer Materials Inc. Both acetonitrile and dichloromethane (DCM) were dried and distilled from calcium hydride under an atmosphere of dry nitrogen. Chloroform was dried and distilled from anhydrous calcium chloride under an atmosphere of dry nitrogen. Toluene was dried and distilled from sodium with benzophenone as indicator under an atmosphere of dry nitrogen. All other reagents were used as received.

## 2. Organic synthesis

### Synthesis of 2-(1,1-dicyanomethylene)rhodanine (RCN)

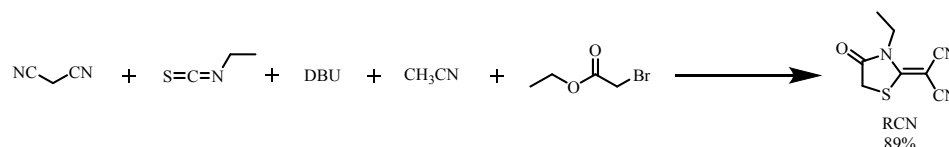

Under an argon atmosphere, a mixture of malononitrile (1.2 g, 18.6 mmol), ethyl isothiocyanate (1.9 mL, 20.5 mmol), 1,8-diazabicyclo[5.4.0]-7-undecene (DBU) (2.7 mL, 18.1 mmol), and anhydrous acetonitrile (60 mL) was stirred at room temperature for 0.5 h. Afterwards, ethyl bromoacetate (3.4 mL, 30.5 mmol) was added. The mixture was further stirred at room temperature for 1 h and then refluxed for 4 h. After the completion of reaction, the product was concentrated, acidified with aqueous 2 M hydrochloric acid (60 mL) and extracted with DCM. The organic extraction was dried over anhydrous sodium sulfate. After the solvent was removed under reduced pressure, the residue was purified by silica gel flash column chromatography using DCM as the eluent to afford the crude product. The crude product was purified by recrystallization from n-hexane to afford RCN as a pale yellow solid (3.1 g, 89%). <sup>1</sup>H NMR (600 MHz, chloroform-*d*,  $\delta$ ): 4.19 (q,  $J$  = 7.2 Hz, 2H,  $-\underline{\text{CH}_2}\text{CH}_3$ ), 4.00 (s, 2H,  $-\text{CH}_2-$ ), 1.36 (t,  $J$  = 7.2 Hz, 3H,  $-\text{CH}_3$ ).

### Synthesis of thiobarbituric acid (TBA)

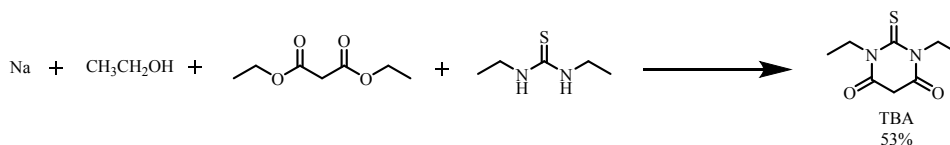

Under an argon atmosphere, sodium (4.6 g, 200 mmol) was first dissolved in absolute ethyl alcohol (200 mL) to prepare a solution of sodium ethylate. Then diethyl malonate (32.0 g, 200 mmol) and N,N'-Diethylthiourea (6.6 g, 50 mmol) were added to the solution, and the resulting mixture was allowed to stir at reflux for 48 h. After the completion of reaction as indicated by thin-layer chromatography (TLC), the reaction mixture was diluted with water (100 mL). Then most of the ethyl alcohol was removed under reduced pressure. The residue was poured into cold water (100 mL), chilled and filtered. The aqueous layer was washed with ether (2 × 50 mL) to remove any unreacted diethyl malonate. The aqueous layer was acidified with diluted hydrochloric acid, and the resulting solid was filtered off, washed with cold water and ether, and dried to afford TBA as a white solid (5.3 g, 53%). <sup>1</sup>H NMR (600 MHz, chloroform-*d*, δ): 4.19 (q, *J* = 7.2 Hz, 4H,  $-\underline{\text{CH}_2}\text{CH}_3$ ), 4.00 (s, 2H,  $-\text{CH}_2-$ ), 1.36 (t, *J* = 7.2 Hz, 6H,  $-\text{CH}_3$ ).

### Synthesis of 3-Bromocyclohex-2-enon

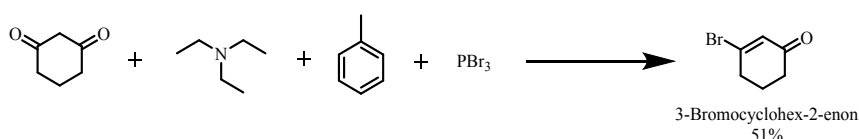

Under an argon atmosphere, phosphorus tribromide (4.6 mL, 49.0 mmol) was added into a solution of 1,3-cyclohexanedione (5.0 g, 44.5 mmol) and triethylamine (6.8 mL, 49.0 mmol) in toluene (175 mL) at -10 °C. The reaction was then stirred at room temperature for 36 h and then poured into ice-water (200 mL). The mixture was extracted with ether, and the organic extraction was washed with saturated sodium bicarbonate solution (100 mL) and distilled water (3×100 mL) and dried over anhydrous sodium sulfate. After removing the solvent under reduced pressure, the residue was purified by silica gel flash column chromatography using

DCM/petroleum ether (PE) (1:1, V/V) as the eluent to afford 3-Bromocyclohex-2-enon as a colorless liquid (4.0 g, 51%).  $^1\text{H}$  NMR (600 MHz, chloroform-*d*):  $\delta$  6.47 (s, 1H, =CH–), 2.82–2.80 (m, 2H, –CH<sub>2</sub>–), 2.42–2.30 (m, 2H, –CH<sub>2</sub>–), 2.10–2.05 (m, 2H, –CH<sub>2</sub>–).

### Synthesis of IDT-R

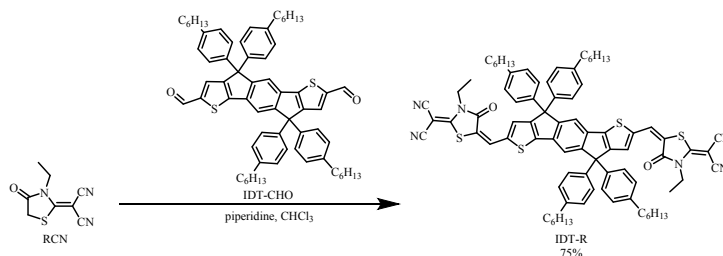

Under an argon atmosphere, IDT-CHO (96 mg, 0.1 mmol) and RCN (194 mg, 1.0 mmol) were dissolved in anhydrous chloroform (10 mL) containing 2  $\mu\text{L}$  of piperidine, and then the mixture was refluxed for 48 h. After cooling to room temperature, the reaction was quenched with 20 mL of distilled water and extracted with DCM. The organic extraction was dried with anhydrous sodium sulfate, and the solvent was removed under reduced pressure. The residue was purified by silica gel flash column chromatography using DCM/PE (1:1, V/V) as the eluent to afford pure product IDT-R as a red solid (98 mg, 75%).  $^1\text{H}$  NMR (600 MHz, chloroform-*d*):  $\delta$  8.06 (s, 2H, =CH–), 7.61 (s, 2H, ArH), 7.39 (s, 2H, ArH), 7.13 (d,  $J$  = 8.4 Hz, 8H, ArH), 7.10 (d,  $J$  = 8.4 Hz, 8H, ArH), 4.30 (q,  $J$  = 7.1 Hz, 4H, –CH<sub>2</sub>–), 2.57 (t,  $J$  = 7.8 Hz, 8H, –CH<sub>2</sub>Ar–), 1.61–1.58 (m, 8H, –CH<sub>2</sub>–), 1.40 (t,  $J$  = 7.2 Hz, 6H, –CH<sub>3</sub>), 1.34–1.27 (m, 24H, –CH<sub>2</sub>–), 0.88–0.86 (m, 12H, –CH<sub>3</sub>).  $^{13}\text{C}$  NMR (101 MHz, chloroform-*d*):  $\delta$  165.91, 165.46, 158.32, 155.13, 150.54, 142.46, 140.50, 140.47, 135.87, 131.21, 129.82, 128.88, 127.75, 119.03, 113.44, 112.92, 112.38, 63.35, 55.77, 40.79, 35.68, 31.83, 31.44, 29.22, 22.72, 14.33, 14.23. HRMS (APCI):  $[\text{M} + \text{H}]^+ = 1313.5564$  (calcd for  $\text{C}_{82}\text{H}_{85}\text{N}_6\text{O}_2\text{S}_4^+$ , 1313.5611)

### Synthesis of IDTT-R

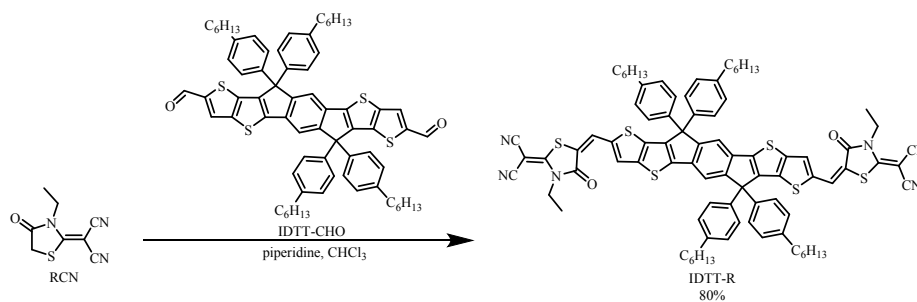

Under an argon atmosphere, IDTT-CHO (108 mg, 0.1 mmol) and RCN (117 mg, 0.6 mmol) were dissolved in anhydrous chloroform (10 mL) containing 0.1 mL of piperidine. After refluxing for 4 h, the reaction was cooled to room temperature, quenched with 20 mL of distilled water and then extracted with DCM. The organic extraction was dried with anhydrous sodium sulfate, and the solvent was removed under reduced pressure. The residue was purified by silica gel flash column chromatography using DCM as the eluent to afford pure product IDTT-R as a dark blue solid (106 mg, 80%).  $^1\text{H}$  NMR (600 MHz, chloroform-*d*):  $\delta$  8.03 (s, 2H, =CH–), 7.66 (s, 2H, ArH), 7.59 (s, 2H, ArH), 7.17 (d,  $J$  = 8.4 Hz, 8H, ArH), 7.14 (d,  $J$  = 8.4 Hz, 8H, ArH), 4.31 (q,  $J$  = 7.1 Hz, 4H, –CH<sub>2</sub>–), 2.58 (t,  $J$  = 7.8 Hz, 8H, –CH<sub>2</sub>Ar–), 1.62–1.60 (m, 8H, –CH<sub>2</sub>–), 1.40 (t,  $J$  = 7.2 Hz, 6H, –CH<sub>3</sub>), 1.35–1.28 (m, 24H, –CH<sub>2</sub>–), 0.87–0.85 (m, 12H, –CH<sub>3</sub>).  $^{13}\text{C}$  NMR (101 MHz, chloroform-*d*):  $\delta$  165.99, 165.45, 154.95, 149.03, 146.99, 143.67, 142.66, 139.88, 139.14, 137.86, 136.63, 129.56, 128.98, 128.05, 127.92, 118.08, 113.43, 113.05, 112.43, 63.28, 55.68, 40.83, 35.73, 31.82, 31.35, 29.31, 22.72, 14.32, 14.22. HRMS (APCI):  $[\text{M} + \text{H}]^+ = 1425.5004$  (calcd for  $\text{C}_{86}\text{H}_{85}\text{N}_6\text{O}_2\text{S}_6^+$ , 1425.5053)

### Synthesis of IDTT-T

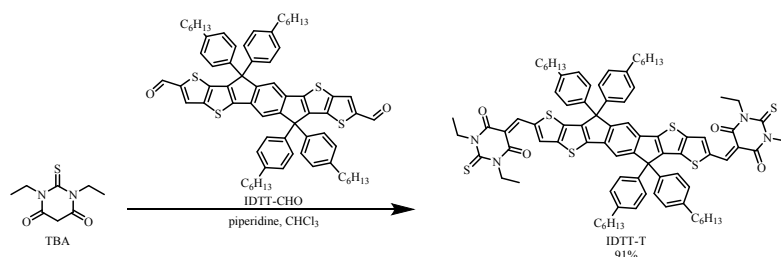

Under an argon atmosphere, IDTT-CHO (108 mg, 0.1 mmol) and TBA (80 mg, 0.4 mmol)

were dissolved in anhydrous chloroform (10 mL) containing 0.1 mL of piperidine. After refluxing for 18 h, the reaction was cooled to room temperature, and quenched with 20 mL of distilled water and then extracted with DCM. The organic extraction was dried with anhydrous sodium sulfate and the solvent was removed under reduced pressure. The residue was purified by silica gel flash column chromatography using DCM/PE (1:1, V/V) as the eluent to afford pure product IDTT-T as a dark blue solid (131 mg, 91%). <sup>1</sup>H NMR (400 MHz, chloroform-*d*): δ 8.65 (s, 2H, =CH–), 8.16 (s, 2H, ArH), 7.62 (s, 2H, ArH), 7.22 (d, *J* = 8.4 Hz, 8H, ArH), 7.13 (d, *J* = 8.4 Hz, 8H, ArH), 4.62–4.52 (m, 8H, –CH<sub>2</sub>–), 2.57 (t, *J* = 7.8 Hz, 8H, –CH<sub>2</sub>–), 1.62–1.59 (m, 8H, –CH<sub>2</sub>–), 1.39–1.29 (m, 36H, –CH<sub>2</sub>–, –CH<sub>3</sub>), 0.86 (t, *J* = 6.6 Hz, 12H, –CH<sub>3</sub>). <sup>13</sup>C NMR (101 MHz, chloroform-*d*): δ 178.69, 161.14, 159.81, 155.72, 152.90, 149.79, 148.04, 147.66, 143.49, 142.61, 140.01, 139.13, 138.23, 136.95, 128.97, 128.04, 118.67, 110.28, 100.12, 63.46, 44.14, 43.28, 35.74, 31.83, 31.38, 29.31, 22.72, 14.22, 12.66, 12.53. HRMS (APCI): [M + H]<sup>+</sup> = 1439.5627 (calcd for C<sub>86</sub>H<sub>95</sub>N<sub>4</sub>O<sub>4</sub>S<sub>6</sub><sup>+</sup>, 1439.5672)

## Synthesis of BrCR

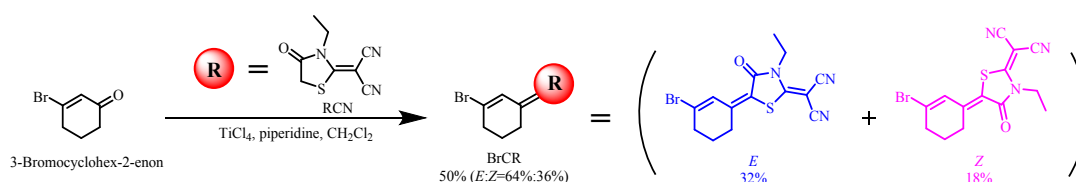

Under an argon atmosphere, 3-Bromocyclohex-2-enon (0.4 mL, 3.72 mmol) and RCN (476 mg, 2.48 mmol) were dissolved in anhydrous DCM (20 mL) at 0 °C, and then tetrachloride (0.4 mL, 3.72 mmol) and anhydrous pyridine (0.6 mL, 7.44 mmol) were added. After stirred at 0 °C for 1 h, the reaction was stirred at room temperature for another 36 h and then poured into distilled water (40 mL). The mixture was extracted with DCM, and the organic layer was dried over anhydrous sodium sulfate. After removing the solvent under reduced pressure, the residue was purified by silica gel flash column chromatography using DCM as the eluent to afford pure BrCR as a yellow solid (437 mg, 50%, *E:Z*=64%:36%). <sup>1</sup>H NMR (600 MHz,

chloroform-*d*):  $\delta$  8.26 (s, 0.56H, =CH-, *E*), 6.55 (s, 0.31H, =CH-, *Z*), 4.23–4.20 (m, 2H, –CH<sub>2</sub>–), 3.19–3.16 (m, 0.71H, –CH<sub>2</sub>–, *Z*), 2.80–2.77 (m, 2H, –CH<sub>2</sub>–), 2.45–2.42 (m, 1.28H, –CH<sub>2</sub>–, *E*), 2.04–1.97 (m, 1.28H, –CH<sub>2</sub>–, *E*), 1.97–1.90 (m, 0.71H, –CH<sub>2</sub>–, *Z*), 1.36 (t, *J* = 7.2 Hz, 3H). <sup>13</sup>C NMR (101 MHz, chloroform-*d*):  $\delta$  165.11, 164.77, 163.66, 148.02, 146.63, 142.56, 140.86, 129.28, 126.58, 113.53, 113.40, 112.77, 112.60, 112.54, 54.67, 54.18, 40.33, 36.60, 36.35, 30.63, 25.32, 23.21, 23.09, 14.18. HRMS (APCI): [M - H]<sup>+</sup> = 347.9811 (calcd for C<sub>14</sub>H<sub>11</sub>BrN<sub>3</sub>OS<sup>+</sup>, 347.9812)

BrCR (294 mg, 0.84 mmol) was dissolved in chloroform (10 mL) at room temperature, and then *n*-hexane (10 mL) was added slowly to the top of BrCR solution. After two days, light yellow crystals precipitated in the solution and were separated to afford pure *Z*-BrCR (80 mg, 27%) by filtration. <sup>1</sup>H NMR (600 MHz, CDCl<sub>3</sub>):  $\delta$  6.55 (s, 1H, =CH–), 4.30 (q, *J* = 7.2 Hz, 2H, –CH<sub>2</sub>–), 3.18 (t, *J* = 6.6 Hz, 2H, –CH<sub>2</sub>–), 2.78 (t, *J* = 6.6 Hz, 2H, –CH<sub>2</sub>–), 1.96–1.91 (m, 1H, –CH<sub>2</sub>–), 1.36 (t, *J* = 7.2 Hz, 3H). <sup>13</sup>C NMR (151 MHz, CDCl<sub>3</sub>):  $\delta$  165.14, 164.78, 148.03, 142.57, 129.29, 113.54, 112.78, 112.61, 54.21, 40.35, 36.62, 25.34, 23.23, 14.23.

The above filtrate was concentrated and purified by silica gel flash column chromatography using DCM/PE (7:3, V/V) as the eluent to afford pure *E*-BrCR as a yellow powder (74 mg, 25%). <sup>1</sup>H NMR (600 MHz, CDCl<sub>3</sub>):  $\delta$  8.26 (s, 1H, =CH–), 4.23 (q, *J* = 7.2 Hz, 2H, –CH<sub>2</sub>–), 2.78 (t, *J* = 6.6 Hz, 2H, –CH<sub>2</sub>–), 2.44 (t, *J* = 6.6 Hz, 2H, –CH<sub>2</sub>–), 2.03–1.98 (m, 1H, –CH<sub>2</sub>–), 1.36 (t, *J* = 7.2 Hz, 3H). <sup>13</sup>C NMR (151 MHz, CDCl<sub>3</sub>):  $\delta$  165.11, 163.65, 146.62, 140.87, 126.57, 113.53, 113.40, 112.54, 54.67, 40.33, 36.35, 30.63, 23.10, 14.19.

## Synthesis of ClCT

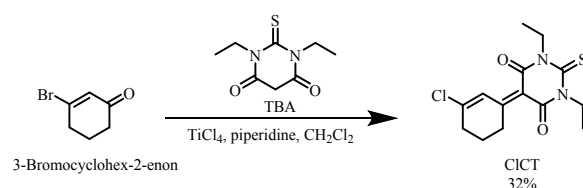

Under an argon atmosphere, 3-Bromocyclohex-2-enon (0.6 mL, 5.52 mmol) and TBA



(1.10 g, 5.52 mmol) were dissolved in anhydrous DCM (30 mL) at 0 °C, and then titanium tetrachloride (0.6 mL, 5.52 mmol) and anhydrous pyridine (0.9 mL, 11.04 mmol) were added. After stirred at 0 °C for 1 h, the reaction was stirred at room temperature for another 28 h and then poured into distilled water (60 mL). The mixture was extracted with DCM, and the organic layer was dried over anhydrous sodium sulfate. After removing the solvent under reduced pressure, the residue was purified by silica gel flash column chromatography using DCM/PE (1:1, V/V) as the eluent to afford pure ClCT as a yellow solid (624 mg, 32%). <sup>1</sup>H NMR (400 MHz, chloroform-*d*): δ 8.29 (s, 1H, =CH–), 4.52–4.45 (m, 4H, –CH<sub>2</sub>–), 3.17–3.14 (m, 2H, –CH<sub>2</sub>–), 2.66–2.63 (m, 2H, –CH<sub>2</sub>–), 1.98–1.92 (m, 2H, –CH<sub>2</sub>–), 1.29–1.25 (m, 6H, –CH<sub>3</sub>). <sup>13</sup>C NMR (101 MHz, chloroform-*d*): δ 178.43, 167.19, 160.74, 160.26, 156.86, 127.05, 113.91, 43.86, 43.75, 34.33, 28.98, 22.95, 12.64. HRMS (APCI): [M + H]<sup>+</sup> = 313.0769 (calcd for C<sub>14</sub>H<sub>18</sub>ClN<sub>2</sub>O<sub>2</sub>S<sup>+</sup>, 313.0772)

### Synthesis of IDT-CR

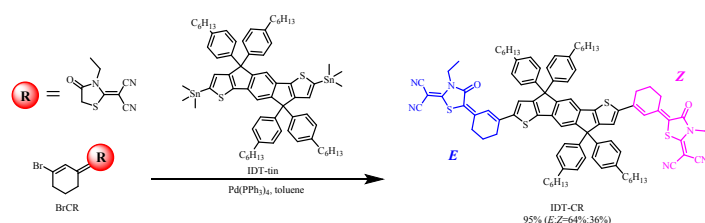

Under an argon atmosphere, IDT-tin (160 mg, 0.13 mmol) and BrCR (116 mg, 0.33 mmol) and Pd(PPh<sub>3</sub>)<sub>4</sub> (12 mg, 0.01 mmol) were added into anhydrous toluene (15 mL). After refluxing for 20 h, the reaction was cooled to room temperature, and quenched with 30 mL of distilled water and then extracted with DCM. The organic layer was dried with anhydrous sodium sulfate, and the solvent was removed under reduced pressure. The residue was purified by silica gel flash column chromatography using DCM/PE (7:3, V/V) as eluent to afford pure product IDT-CR as a dark blue solid (179 mg, 95%, *E*:*Z*=64%:36%). <sup>1</sup>H NMR (600 MHz, chloroform-*d*): δ 8.45 (s, 1.19H, =CH–, *E*), 7.48 (s, 0.27H, ArH, *Z*), 7.47 (s, 0.42H,

ArH, *Z*), 7.43 (s, 0.48H, ArH, *E*), 7.42 (s, 0.76H, ArH, *E*), 7.29 (s, 0.69H, ArH, *Z*), 7.27 (s, 1.25H, ArH, *E*), 7.15–7.08 (m, 16H, ArH), 6.51 (s, 0.67H, =CH–, *Z*), 4.27–4.21 (m, 4H, –CH<sub>2</sub>–), 3.21–3.19 (m, 1.38H, –CH<sub>2</sub>–, *Z*), 2.74–2.71 (m, 4H, –CH<sub>2</sub>–), 2.58–2.55 (m, 8H, –ArCH<sub>2</sub>–), 2.49–2.46 (m, 2.50H, –CH<sub>2</sub>–, *E*), 2.02–1.98 (m, 2.47H, –CH<sub>2</sub>–, *E*), 1.94–1.90 (m, 1.39H, –CH<sub>2</sub>–, *Z*), 1.62–1.59 (m, 8H, –CH<sub>2</sub>–), 1.39–1.29 (m, 30H, –CH<sub>3</sub>, –CH<sub>2</sub>–), 0.88–0.86 (m, 12H, –CH<sub>3</sub>). <sup>13</sup>C NMR (101 MHz, chloroform-*d*): δ 165.31, 165.17, 164.60, 163.90, 157.73, 157.59, 154.44, 150.53, 149.41, 148.52, 147.78, 147.67, 146.56, 146.24, 145.47, 144.93, 142.02, 141.25, 135.73, 135.51, 128.67, 127.87, 123.14, 120.04, 118.37, 118.18, 114.09, 113.12, 111.52, 111.05, 63.28, 53.08, 52.71, 40.19, 35.70, 31.85, 31.67, 31.46, 29.26, 27.88, 26.89, 22.73, 21.79, 14.24. HRMS (APCI): [M + H]<sup>+</sup> = 1445.6527 (calcd for C<sub>92</sub>H<sub>97</sub>N<sub>6</sub>O<sub>2</sub>S<sub>4</sub><sup>+</sup>, 1445.6550)

## Synthesis of IDTT-CR

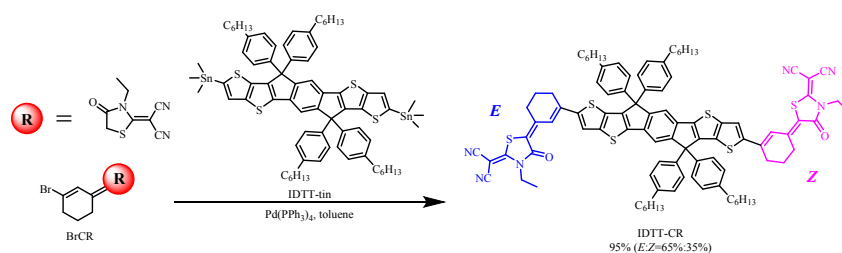

Under an argon atmosphere, IDTT-tin (175 mg, 0.13 mmol) and BrCR (116 mg, 0.33 mmol) and Pd(PPh<sub>3</sub>)<sub>4</sub> (12 mg, 0.01 mmol) were added in anhydrous toluene (15 mL). After refluxing for 20 h, the reaction was cooled to room temperature, and quenched with 30 mL of distilled water and then extracted with DCM. The organic extraction was dried with anhydrous sodium sulfate and the solvent was removed under reduced pressure. The residue was purified by silica gel flash column chromatography using DCM/PE (7:3, V/V) as eluent to afford pure IDTT-CR<sup>1</sup> as a dark blue solid (179 mg, 96%, *E*:*Z*=65%:35%). <sup>1</sup>H NMR (600 MHz, chloroform-*d*): δ 8.35 (s, 1.19H, =CH–, *E*), 7.60 (s, 0.67H, ArH, *Z*), 7.58 (s, 1.24H, ArH, *E*), 7.54 (s, 0.23H, ArH, *Z*), 7.53 (s, 0.42H, ArH, *Z*), 7.51 (s, 0.43H, ArH, *E*), 7.50 (s, 0.78H, ArH,

*E*), 7.19–7.10 (m, 16H, ArH), 6.44 (s, 0.63H, =CH–, *Z*), 4.28–4.22 (m, 4H, –CH<sub>2</sub>–), 3.22–3.20 (m, 1.31H, –CH<sub>2</sub>–, *Z*), 2.78–2.74 (m, 4H, –CH<sub>2</sub>–), 2.58–2.55 (m, 8H, –ArCH<sub>2</sub>–), 2.47–2.45 (m, 2.47H, –CH<sub>2</sub>–, *E*), 2.03–1.99 (m, 2.56H, –CH<sub>2</sub>–, *E*), 1.95–1.91 (m, 1.36H, –CH<sub>2</sub>–, *Z*), 1.62–1.58 (m, 8H, –CH<sub>2</sub>–), 1.40–1.28 (m, 30H, –CH<sub>3</sub>, –CH<sub>2</sub>–), 0.87–0.85 (m, 12H, –CH<sub>3</sub>). <sup>13</sup>C NMR (101 MHz, chloroform-*d*): δ 165.32, 165.13, 164.63, 163.90, 154.51, 154.36, 150.49, 149.24, 148.23, 147.06, 146.84, 146.61, 145.94, 145.36, 144.27, 143.04, 142.32, 142.22, 139.71, 139.56, 136.34, 135.96, 128.77, 128.09, 120.74, 120.19, 118.47, 117.53, 114.01, 113.09, 111.82, 111.24, 63.16, 53.26, 52.73, 40.17, 35.75, 31.84, 31.41, 31.37, 29.34, 27.97, 26.96, 22.73, 21.81, 14.23. HRMS (APCI): [M + H]<sup>+</sup> = 1557.5970 (calcd for C<sub>96</sub>H<sub>97</sub>N<sub>6</sub>O<sub>2</sub>S<sub>6</sub><sup>+</sup>, 1557.5991)

Use the same method with *Z*-BrCR as raw material to obtain IDTT-CR<sup>2</sup> (164 mg, 88%, *E*:*Z*=50%:50%). <sup>1</sup>H NMR (600 MHz, CDCl<sub>3</sub>): δ 8.36 (s, 1H, =CH–, *E*), 7.60 (s, 1H, ArH, *Z*), 7.59 (s, 1H, ArH, *E*), 7.53 (s, 0.6H, ArH, *Z*), 7.52 (s, 0.4H, ArH, *Z*), 7.51 (s, 0.4H, ArH, *E*), 7.50 (s, 0.6H, ArH, *E*), 7.19–7.10 (m, 16H, ArH), 6.44 (s, 1H, =CH–, *Z*), 4.28–4.22 (m, 4H, –CH<sub>2</sub>–), 3.21 (t, *J* = 6.6 Hz, 2H, –CH<sub>2</sub>–, *Z*), 2.78–2.75 (m, 4H, –CH<sub>2</sub>–), 2.58–2.55 (m, 8H, –ArCH<sub>2</sub>–), 2.48 (t, *J* = 6.6 Hz, 2H, –CH<sub>2</sub>–, *E*), 2.03–1.99 (m, 2H, –CH<sub>2</sub>–, *E*), 1.95–1.91 (m, 2H, –CH<sub>2</sub>–, *Z*), 1.61–1.59 (m, 8H, –CH<sub>2</sub>–), 1.40–1.28 (m, 30H, –CH<sub>2</sub>–), 0.86 (t, *J* = 6.6 Hz, 12H).

Use the same method with *E*-BrCR as raw material to obtain IDTT-CR<sup>3</sup> (173 mg, 93%, *E*:*Z*=84%:16%). <sup>1</sup>H NMR (600 MHz, CDCl<sub>3</sub>): δ 8.35 (s, 1.63H, =CH–, *E*), 7.60 (s, 0.32H, ArH, *Z*), 7.59 (s, 1.66H, ArH, *E*), 7.53 (s, 0.05H, ArH, *Z*), 7.52 (s, 0.27H, ArH, *Z*), 7.51 (s, 0.33H, ArH, *E*), 7.50 (s, 1.31H, ArH, *E*), 7.19–7.10 (m, 16H, ArH), 6.44 (s, 0.31H, =CH–, *Z*), 4.28–4.22 (m, 4H, –CH<sub>2</sub>–), 3.21 (t, *J* = 6.6 Hz, 0.62H, –CH<sub>2</sub>–, *Z*), 2.78–2.74 (m, 4H, –CH<sub>2</sub>–), 2.58–2.55 (m, 8H, –ArCH<sub>2</sub>–), 2.47 (t, *J* = 6.6 Hz, 3.30H, –CH<sub>2</sub>–, *E*), 2.03–1.99 (m, 3.29H,

–CH<sub>2</sub>–, *E*), 1.95–1.91 (m, 0.62H, –CH<sub>2</sub>–, *Z*), 1.62–1.58 (m, 8H, –CH<sub>2</sub>–), 1.40–1.27 (m, 30H, –CH<sub>2</sub>–), 0.86 (t, *J* = 6.6 Hz, 12H).

### Synthesis of IDT-CT

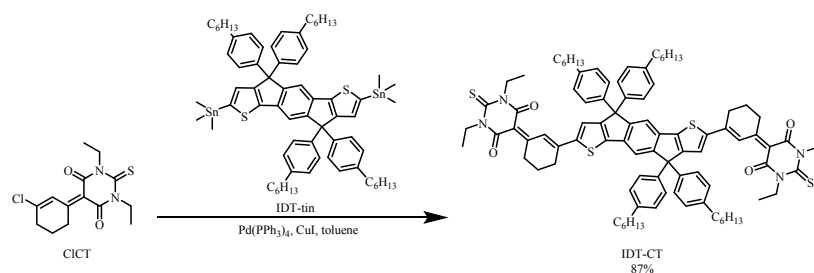

Under an argon atmosphere, IDT-tin (123 mg, 0.10 mmol) and ClCT (109 mg, 0.30 mmol), Pd(PPh<sub>3</sub>)<sub>4</sub> (12 mg, 0.01 mmol) and copper(I) iodide (CuI, 1.8 mg, 0.01 mmol) were added in anhydrous toluene (10 mL). After refluxing for 24 h, the reaction was cooled to room temperature, and quenched with 20 mL of distilled water and then extracted with DCM. The organic layer was dried with anhydrous sodium sulfate and the solvent was removed under reduced pressure. The residue was purified by silica gel flash column chromatography using DCM/PE (1:1, V/V) as the eluent to afford pure product IDT-CT as a dark blue solid (128 mg, 87%). <sup>1</sup>H NMR (600 MHz, chloroform-*d*): δ 8.90 (s, 2H, =CH–), 7.49 (s, 2H, ArH), 7.39 (s, 2H, ArH), 7.15–7.13 (m, 8H, ArH), 7.10–7.09 (m, 8H, ArH), 4.58–4.50 (m, 8H, –CH<sub>2</sub>–), 3.24–3.22 (m, 4H, –CH<sub>2</sub>–), 2.76–2.74 (m, *J* = 6.0 Hz, 4H, –CH<sub>2</sub>–), 2.57 (t, *J* = 7.8 Hz, 8H, –ArCH<sub>2</sub>–), 1.95–1.91 (m, 4H, –CH<sub>2</sub>–), 1.62–1.59 (m, 8H, –CH<sub>2</sub>–), 1.34–1.27 (m, 36H, –CH<sub>3</sub>, –CH<sub>2</sub>–), 0.88–0.86 (m, 12H, –CH<sub>3</sub>). <sup>13</sup>C NMR (101 MHz, chloroform-*d*): δ 178.21, 170.75, 161.11, 160.91, 158.02, 154.85, 154.27, 148.29, 147.12, 142.13, 141.07, 135.98, 128.73, 127.89, 124.76, 123.23, 118.61, 111.73, 63.31, 43.74, 35.72, 31.86, 31.47, 31.17, 29.26, 28.04, 22.74, 22.35, 14.24, 12.78, 12.71. MALDI-TOF MS: [M + H]<sup>+</sup> = 1459.66 (calcd for C<sub>92</sub>H<sub>107</sub>N<sub>4</sub>O<sub>4</sub>S<sub>4</sub><sup>+</sup>, 1459.72)

### Synthesis of IDTT-CT

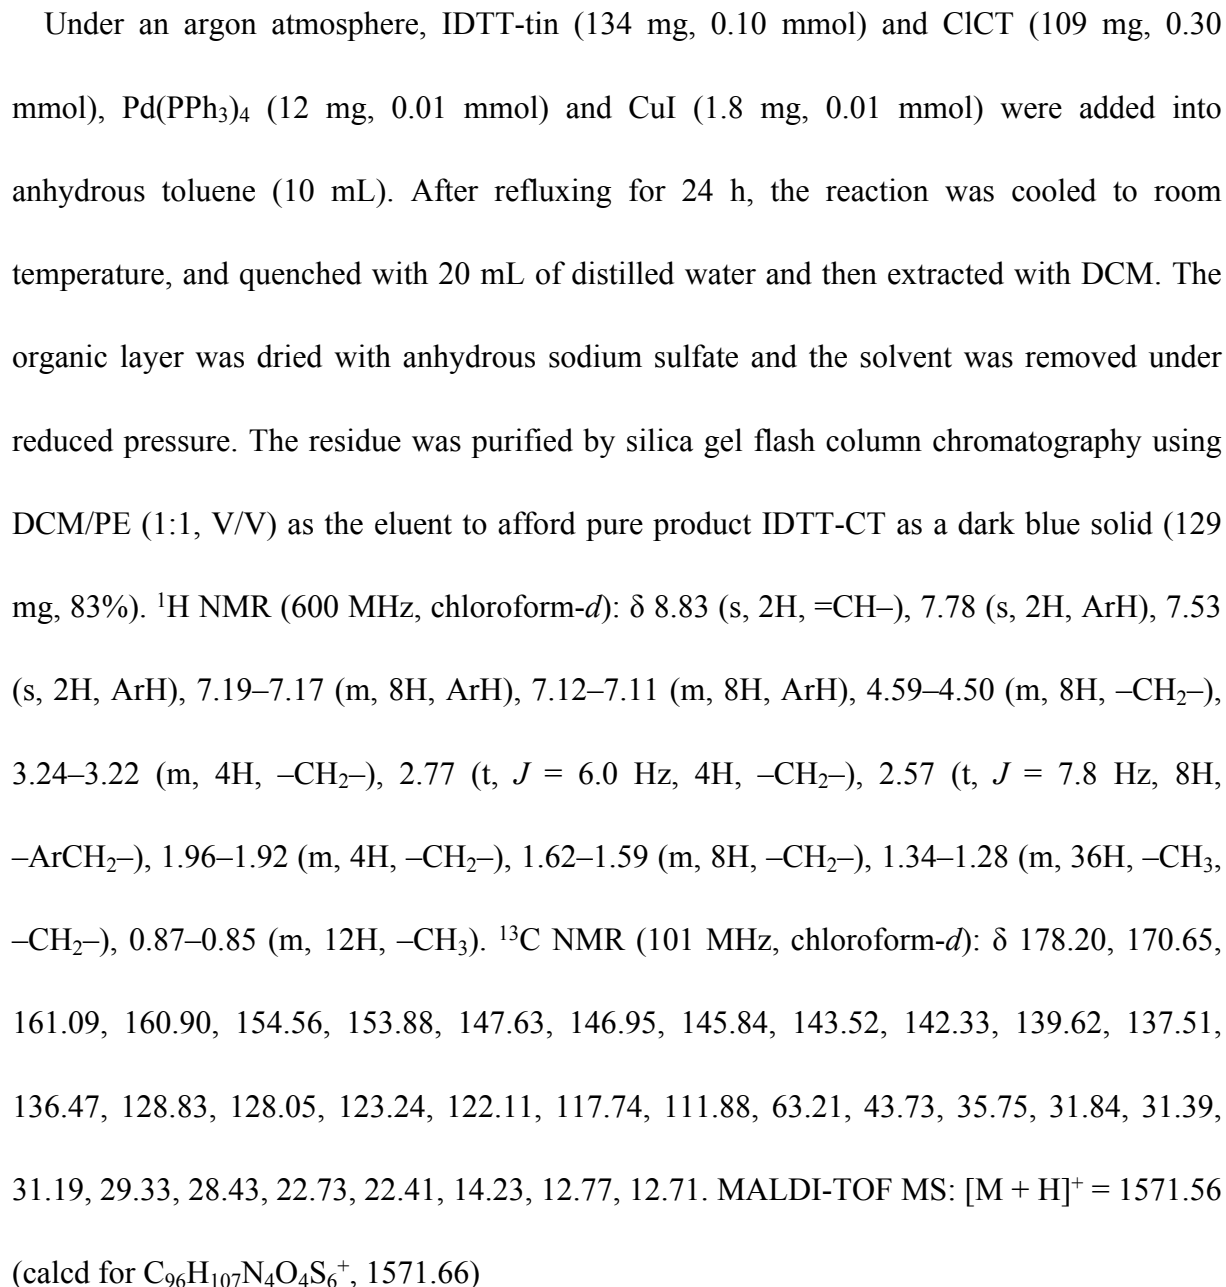

### 3. Supporting Figures and Tables

**Table S1** Crystal data and structure refinement for Z-BrCR.

| <b>Z-BrCR</b>                                   |                                                     |
|-------------------------------------------------|-----------------------------------------------------|
| Empirical formula                               | C <sub>14</sub> H <sub>14</sub> BrN <sub>3</sub> OS |
| Formula weight                                  | 352.25                                              |
| Temperature / K                                 | 296(2)                                              |
| Wavelength / Å                                  | 0.71073                                             |
| Crystal system                                  | Orthorhombic                                        |
| Space group                                     | Pnma                                                |
| a / Å                                           | 15.716(4)                                           |
| b / Å                                           | 7.1522(17)                                          |
| c / Å                                           | 12.863(3)                                           |
| deg                                             | 90                                                  |
| deg                                             | 90                                                  |
| deg                                             | 90                                                  |
| Volume / Å <sup>3</sup>                         | 1445.9(6)                                           |
| Z                                               | 4                                                   |
| Density (calculated) / Mg/m <sup>3</sup>        | 1.618                                               |
| Absorption coefficient / mm <sup>-1</sup>       | 2.986                                               |
| F(000)                                          | 712                                                 |
| Crystal size / mm <sup>3</sup>                  | 0.3 x 0.2 x 0.2                                     |
| Theta range for data collection                 | 2.046 to 25.500°                                    |
| Index ranges                                    | -19<=h<=17, -8<=k<=8, -15<=l<=15                    |
| Reflections collected                           | 10242                                               |
| Independent reflections                         | 1461 [R(int) = 0.0727]                              |
| Completeness to theta = 25.242°                 | 99.9 %                                              |
| Absorption correction                           | Semi-empirical from equivalents                     |
| Max. and min. transmission                      | 0.7460 and 0.5582                                   |
| Refinement method                               | Full-matrix least-squares on F <sup>2</sup>         |
| Data / restraints / parameters                  | 1461 / 3 / 134                                      |
| Goodness-of-fit on F <sup>2</sup>               | 1.060                                               |
| Final R indices [I>2sigma(I)]                   | R1 = 0.0512, wR2 = 0.1476                           |
| R indices (all data)                            | R1 = 0.0755, wR2 = 0.1661                           |
| Extinction coefficient                          | n/a                                                 |
| Largest diff. peak and hole / e.Å <sup>-3</sup> | 0.602 and -0.513                                    |

**Table S2** Crystal data and structure refinement for ClCT.

| ClCT                                            |                                                                   |
|-------------------------------------------------|-------------------------------------------------------------------|
| Empirical formula                               | C <sub>14</sub> H <sub>17</sub> ClN <sub>2</sub> O <sub>2</sub> S |
| Formula weight                                  | 312.80                                                            |
| Temperature / K                                 | 293(2)                                                            |
| Wavelength / Å                                  | 0.71073                                                           |
| Crystal system                                  | Triclinic                                                         |
| Space group                                     | P-1                                                               |
| a / Å                                           | 9.049(3)                                                          |
| b / Å                                           | 9.739(3)                                                          |
| c / Å                                           | 9.862(3)                                                          |
| α / deg                                         | 67.129(5)                                                         |
| β / deg                                         | 82.299(5)                                                         |
| γ / deg                                         | 67.966(5)                                                         |
| Volume / Å <sup>3</sup>                         | 742.2(4)                                                          |
| Z                                               | 2                                                                 |
| Density (calculated) / Mg/m <sup>3</sup>        | 1.400                                                             |
| Absorption coefficient / mm <sup>-1</sup>       | 0.400                                                             |
| F(000)                                          | 328                                                               |
| Crystal size / mm <sup>3</sup>                  | 0.150 x 0.120 x 0.100                                             |
| Theta range for data collection                 | 2.242 to 26.997°                                                  |
| Index ranges                                    | -9 ≤ h ≤ 11, -12 ≤ k ≤ 12, -12 ≤ l ≤ 12                           |
| Reflections collected                           | 6100                                                              |
| Independent reflections                         | 3205 [R(int) = 0.0363]                                            |
| Completeness to theta = 25.242°                 | 98.9 %                                                            |
| Absorption correction                           | None                                                              |
| Refinement method                               | Full-matrix least-squares on F <sup>2</sup>                       |
| Data / restraints / parameters                  | 3205 / 0 / 183                                                    |
| Goodness-of-fit on F <sup>2</sup>               | 0.941                                                             |
| Final R indices [I > 2σ(I)]                     | R1 = 0.0494, wR2 = 0.1365                                         |
| R indices (all data)                            | R1 = 0.0704, wR2 = 0.1572                                         |
| Extinction coefficient                          | n/a                                                               |
| Largest diff. peak and hole / e.Å <sup>-3</sup> | 0.330 and -0.266                                                  |

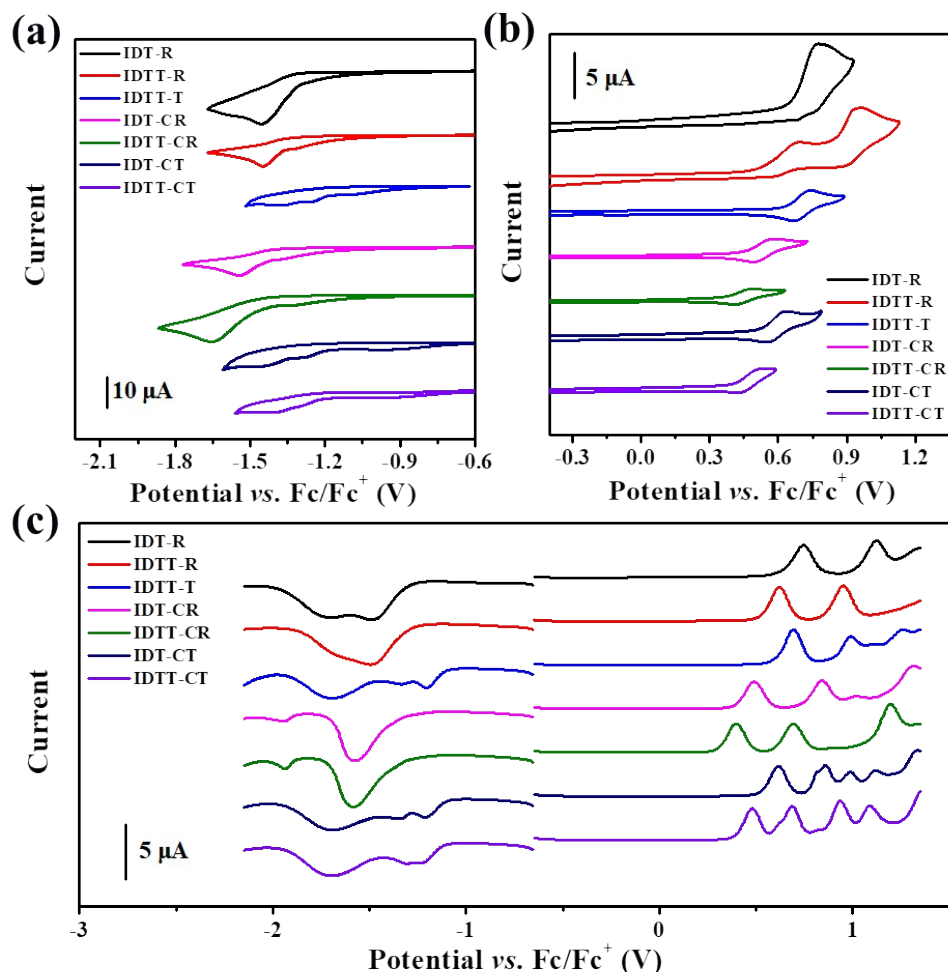

**Fig. S1** Cyclic voltammograms (CVs) (a-b) and differential pulse voltammograms (DPVs) (c) for NFAs (IDT-R, IDTT-R, IDTT-T, IDT-CR, IDTT-CR, IDT-CT and IDTT-CT) in dichloromethane/0.1 M Bu<sub>4</sub>NPF<sub>6</sub> solution.

**Table S3.** Electrochemical data based on DPVs.

| NFAs    | $E_{\text{HOMO}}^{\text{a}}$<br>(eV) | $E_{\text{LUMO}}^{\text{a}}$<br>(eV) | $E_{\text{g,ec}}^{\text{b}}$<br>(eV) |
|---------|--------------------------------------|--------------------------------------|--------------------------------------|
| IDT-R   | -5.55                                | -3.32                                | 2.23                                 |
| IDTT-R  | -5.42                                | -3.31                                | 2.11                                 |
| IDTT-T  | -5.49                                | -3.60                                | 1.89                                 |
| IDT-CR  | -5.29                                | -3.23                                | 2.06                                 |
| IDTT-CR | -5.20                                | -3.22                                | 1.98                                 |
| IDT-CT  | -5.42                                | -3.59                                | 1.83                                 |
| IDTT-CT | -5.28                                | -3.56                                | 1.72                                 |

<sup>a</sup>The HOMO and LUMO energy levels are calculated according to the equation of  $E_{\text{HOMO/LUMO}} = -(E_{\text{ox/red}} + 4.8)$  eV. <sup>b</sup>Calculated according to the equation of  $E_{\text{g,ec}} = E_{\text{LUMO}} - E_{\text{HOMO}}$ .



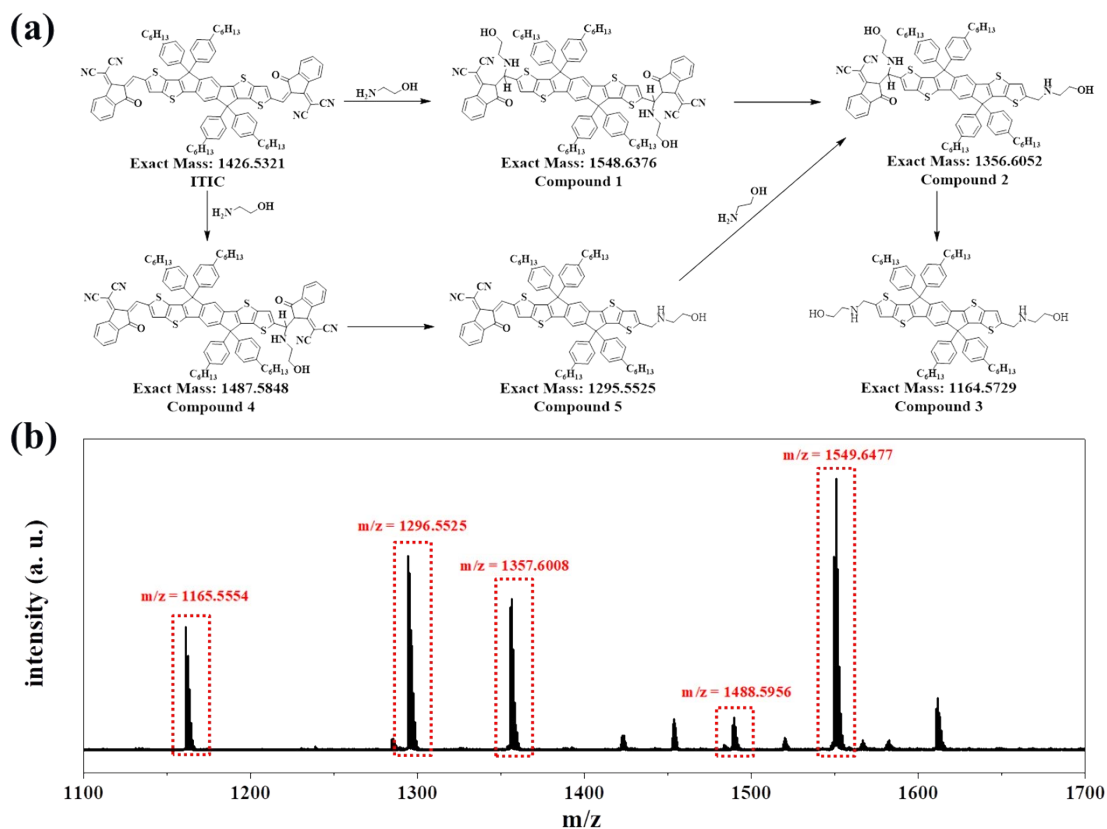

**Fig. S2** (a) The illustration of nucleophilic addition reaction of ITIC with ethanolamine (EA) after 10 min reaction in dichloromethane. (b) HRMS spectrum of products of ITIC with EA after 10 min reaction in dichloromethane.

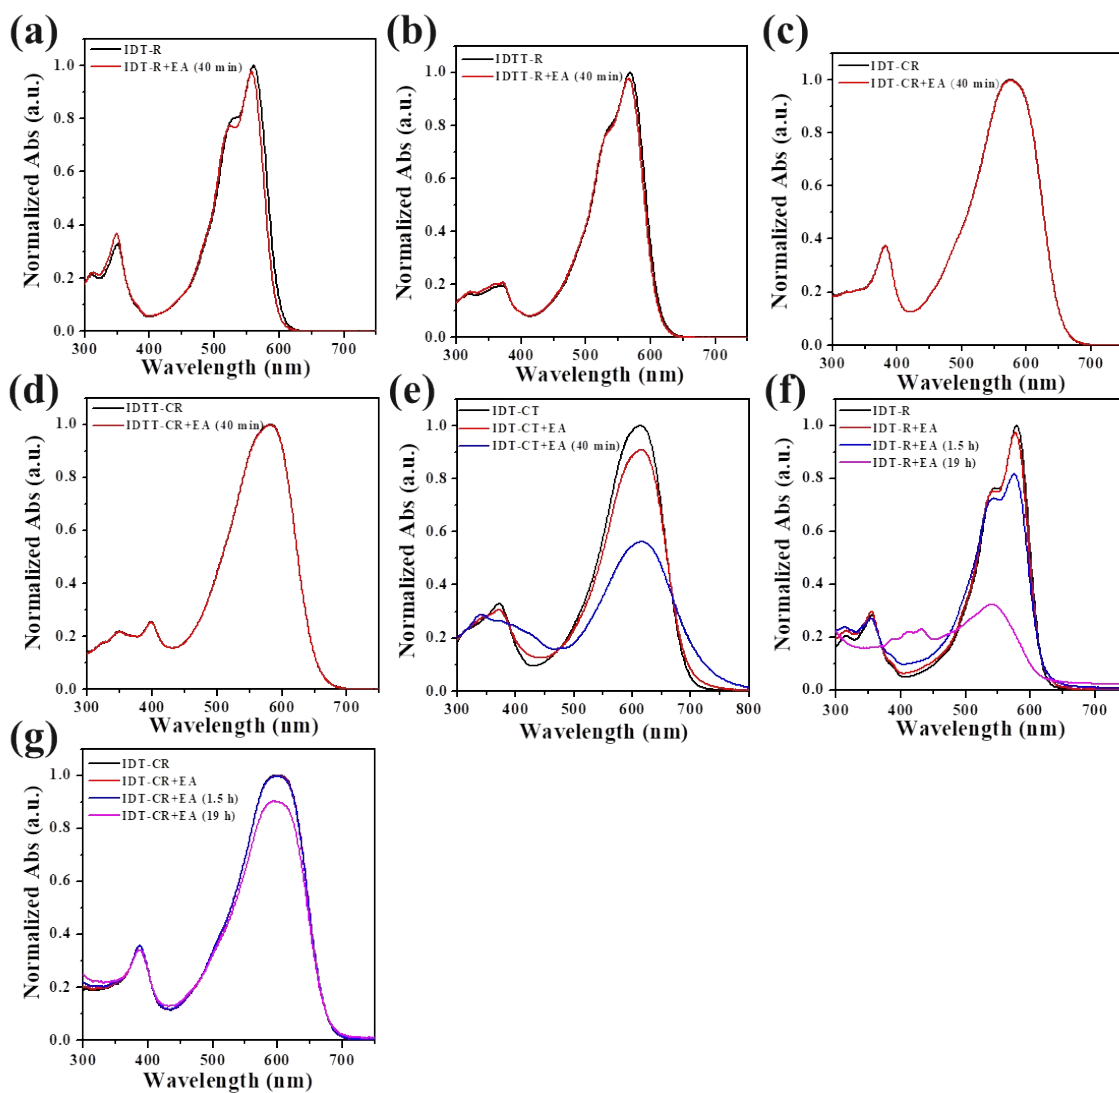

**Fig. S3** Normalized UV-Vis absorption spectra of NFAs, (a) IDT-R, (b) IDTT-R, (c) IDT-CR, (d) IDTT-CR, (e) IDT-CT, (f) IDT-R and (g) IDT-CR, before and after adding ethanolamine (EA) in THF:H<sub>2</sub>O (96:4, V/V). The concentration of NFAs is controlled at 10<sup>-5</sup> M, while that of EA is 10<sup>-3</sup> M (a, b, c, d, e) and 0.15 M (f, g), respectively.

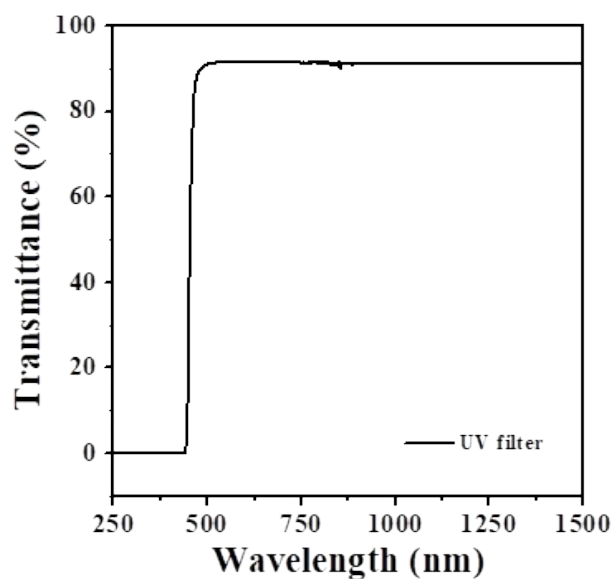

**Fig. S4** Transmission spectrum of UV filter.

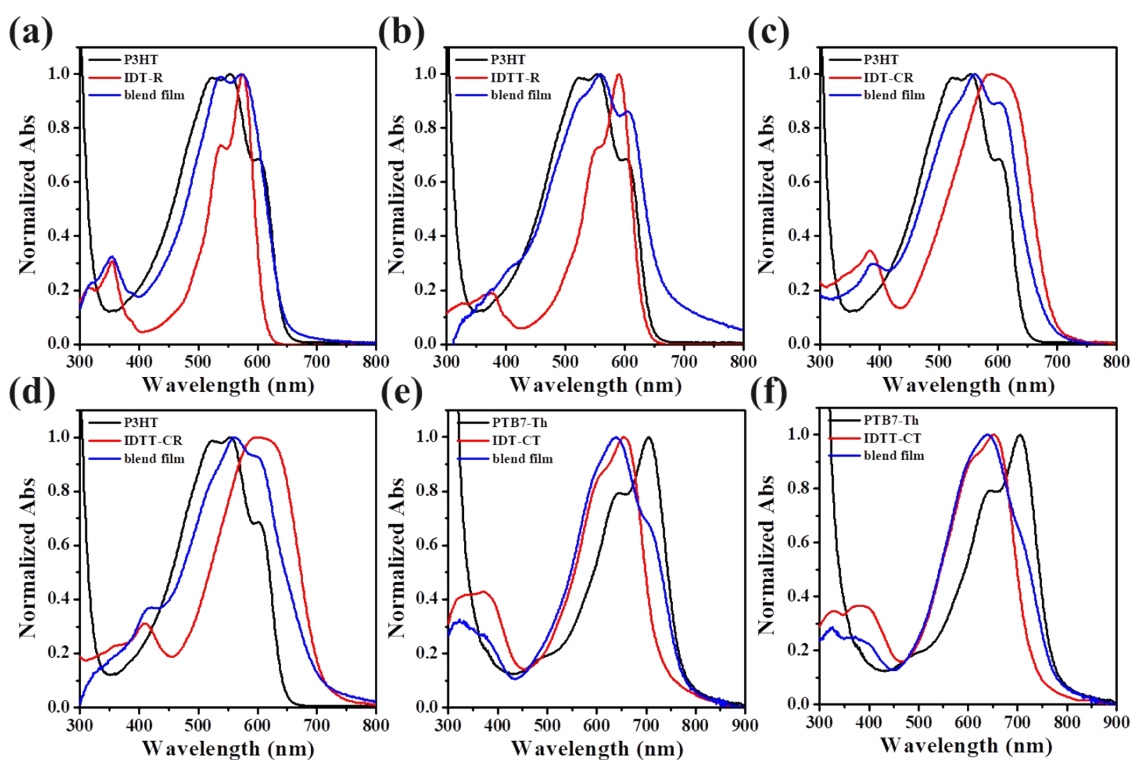

**Fig. S5** Normalized UV-Vis absorption spectra of films, (a) P3HT, IDT-R, and P3HT:IDT-R blend, (b) P3HT, IDTT-R, and P3HT:IDTT-R blend, (c) P3HT, IDT-CR, and P3HT:IDT-CR blend, (d) P3HT, IDTT-CR, and P3HT:IDTT-CR blend, (e) PTB7-Th, IDTT-CT, and PTB7-Th:IDTT-CT blend, (f) PTB7-Th, IDTT-CT, and PTB7-Th:IDTT-CT blend.

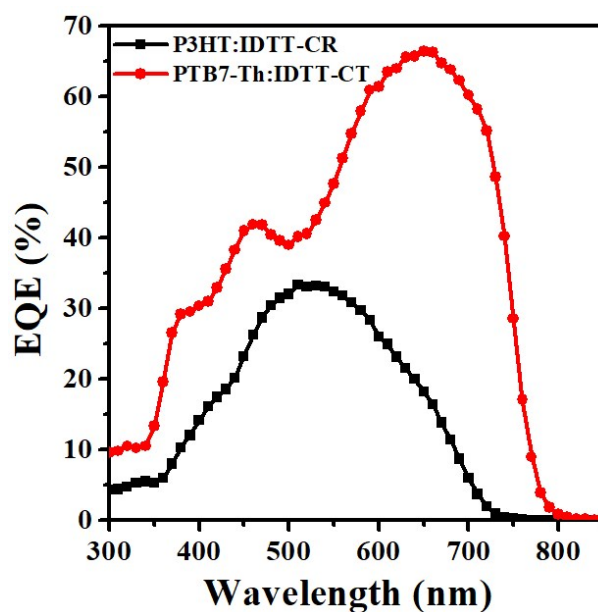

**Fig. S6** EQE spectra of the P3HT:IDTT-CR and PTB7-Th:IDTT-CT -based devices.

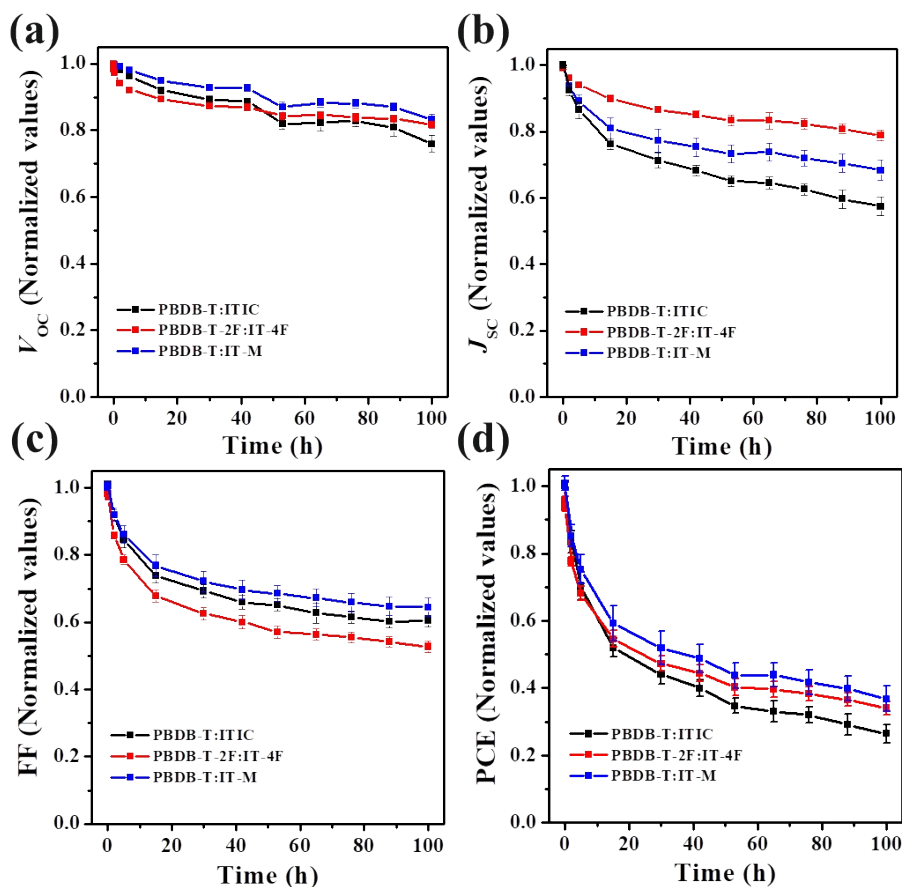

**Fig. S7** The photovoltaic parameters variation of ITIC, IT-4F, and IT-M -based solar cells in a glovebox with dry nitrogen atmosphere under one-sun continuous irradiation: (a)  $V_{OC}$ , (b)  $J_{SC}$ , (c) FF, and (d) PCE.

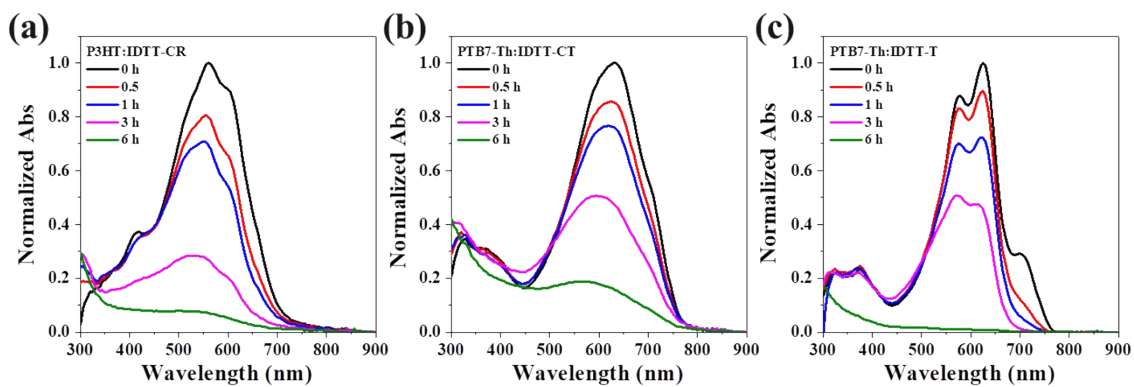

**Fig. S8** Normalized UV-Vis absorption spectra of films in air under continuous light irradiation (100 mW/cm<sup>2</sup>) for 6 h, (a) P3HT:IDTT-CR blend, (b) PTB7-Th:IDTT-CT blend, (c) PTB7-Th:IDTT-T blend, and (d) PTB7-Th:ITIC blend.

**Table S4.** The optimal photovoltaic parameters of solar cells based on the PBDB-T donor under the irradiation (AM 1.5G, 100 mW/cm<sup>2</sup>).

| Donor:acceptor | $V_{oc}$<br>(V) | $J_{sc}$<br>(mA/cm <sup>2</sup> ) | FF<br>(%) | PCE<br>(%)        |
|----------------|-----------------|-----------------------------------|-----------|-------------------|
| PBDB-T:IDTT-CR | 0.84±0.01       | 1.74 ±0.21                        | 40.2±1    | 0.59±0.1 (0.69)   |
| PBDB-T:IDT-CT  | 0.86±0.01       | 6.02 ±0.15                        | 40.4 ±1.6 | 2.09 ±0.08 (2.17) |
| PBDB-T:IDTT-CT | 0.8 ±0.01       | 5.22±0.22                         | 35.5 ±1.5 | 1.48 ±0.15 (1.63) |

Data obtained from the average of 15 individual devices, and the best PCEs are shown in brackets.

**Table S5.** The preparation parameters of OSC devices based on different photoactive layers.

| Active laver    | D:A<br>by wt | solvent | Concentration<br>mg/ml | Speed<br>(rpm) | Anneal<br>Temperature<br>(°C) |
|-----------------|--------------|---------|------------------------|----------------|-------------------------------|
| P3HT:IDT-R      | 1:1          | CB      | 30.0                   | 1000           | 100                           |
| P3HT:IDTT-R     | 1:1          | CB      | 30.0                   | 2000           | 100                           |
| P3HT:IDT-CR     | 1:1          | CB      | 30.0                   | 1000           | 100                           |
| P3HT:IDTT-CR    | 1:1.3        | CB      | 18.4                   | 1000           | 140                           |
| PTB7-Th:IDTT-T  | 1:1.2        | CB      | 25.0                   | 2500           | 100                           |
| PTB7-Th:IDT-CT  | 1:1.4        | CB      | 16.8                   | 2500           | W/O                           |
| PTB7-Th:IDTT-CT | 1:1.4        | CB      | 16.8                   | 3000           | W/O                           |
| PBDB-T:ITIC     | 1:1          | CB      | 20.0                   | 2500           | 150                           |
| PBDB-T-2F:IT-4F | 1:1          | CB      | 20.0                   | 1500           | 100                           |
| PBDB-T:IT-M     | 1:1.2        | CB      | 17.6                   | 1200           | 120                           |

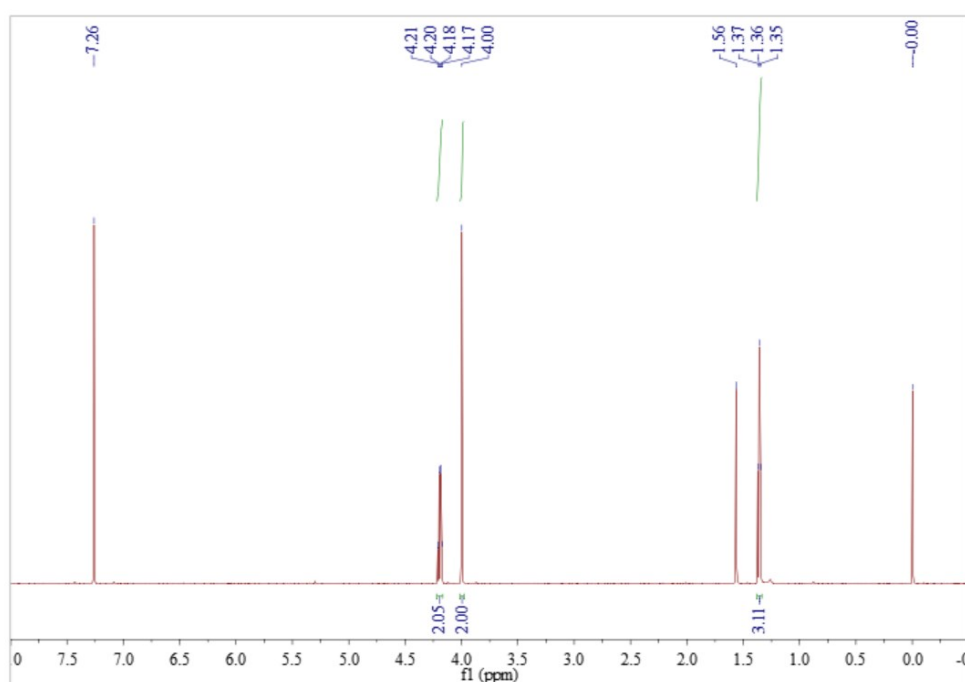

**Fig. S9**  $^1\text{H}$  NMR spectrum of RCN conducted in chloroform-*d*.

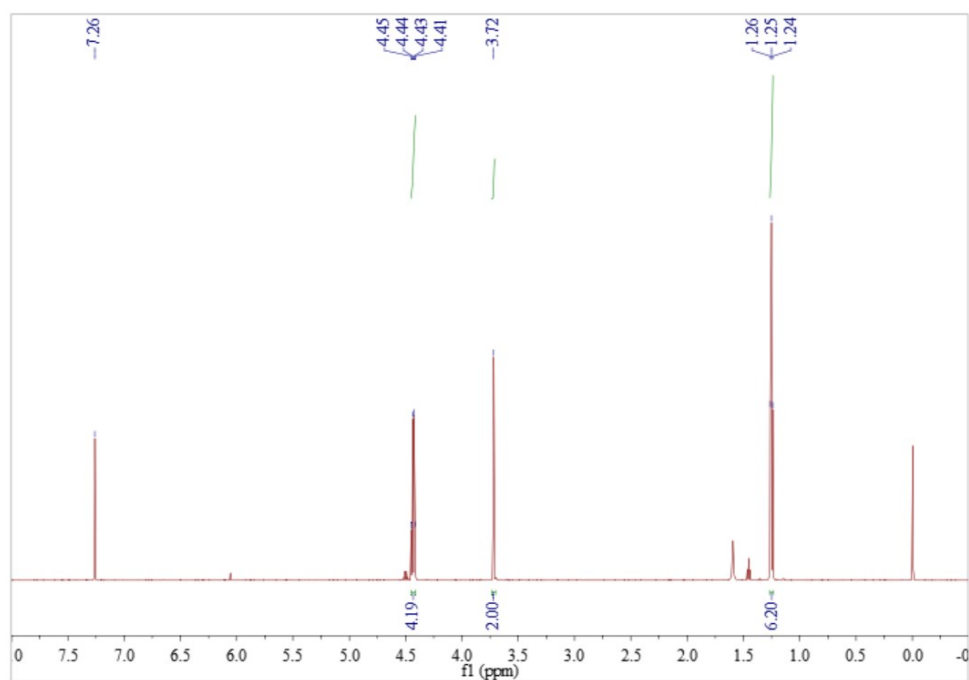

**Fig. S10**  $^1\text{H}$  NMR spectrum of TBA conducted in chloroform-*d*.

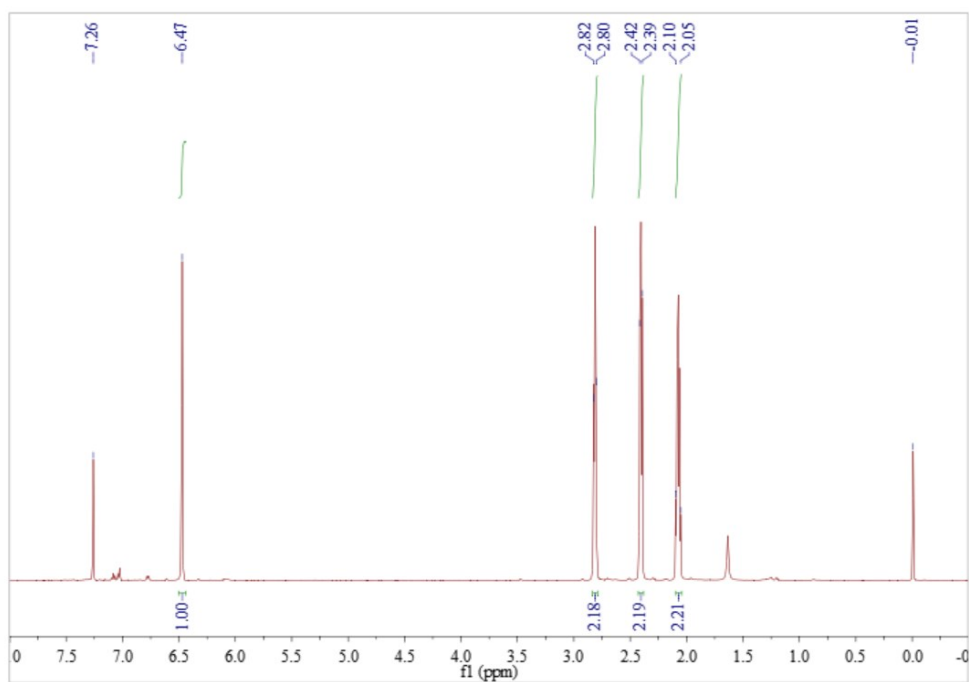

**Fig. S11**  $^1\text{H}$  NMR spectrum of 3-Bromocyclohex-2-enon conducted in chloroform-*d*.

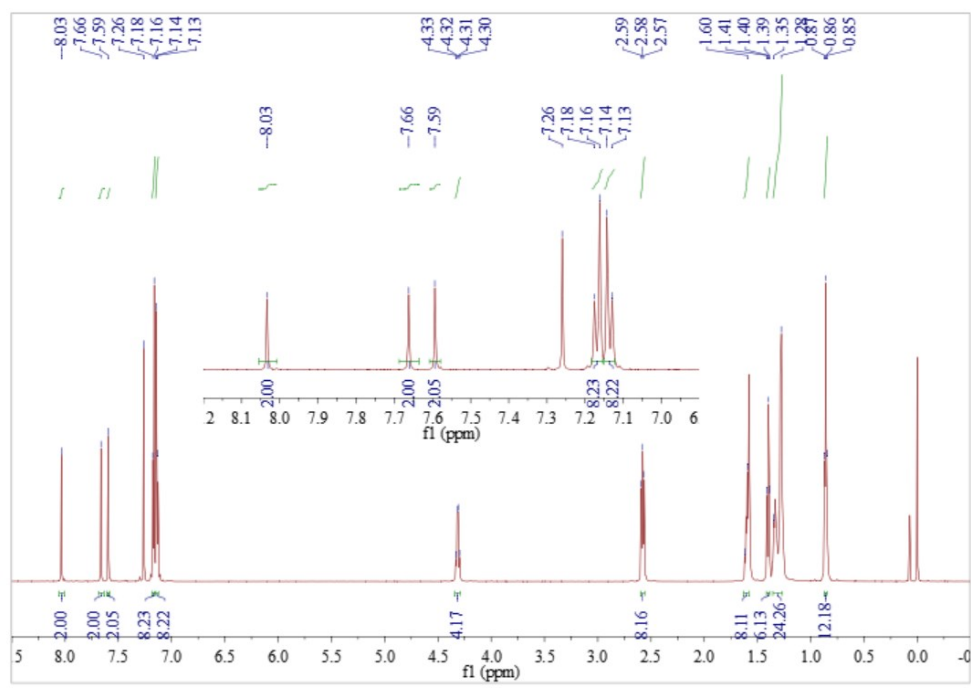

**Fig. S12** <sup>1</sup>H NMR spectrum of IDT-R conducted in chloroform-*d*.

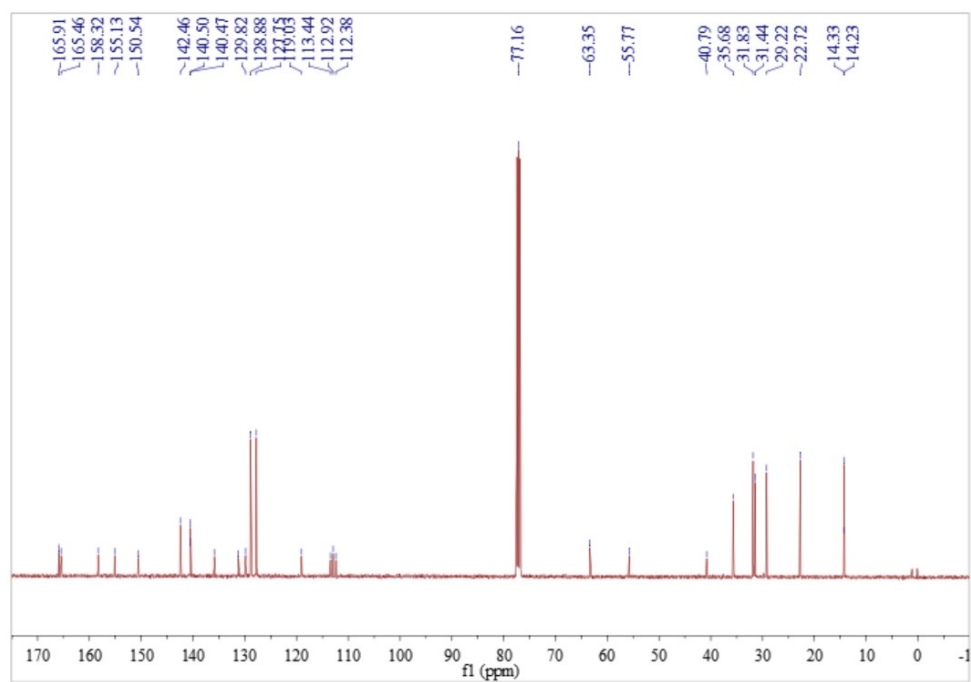

**Fig. S13** <sup>13</sup>C NMR spectrum of IDT-R conducted in chloroform-*d*.

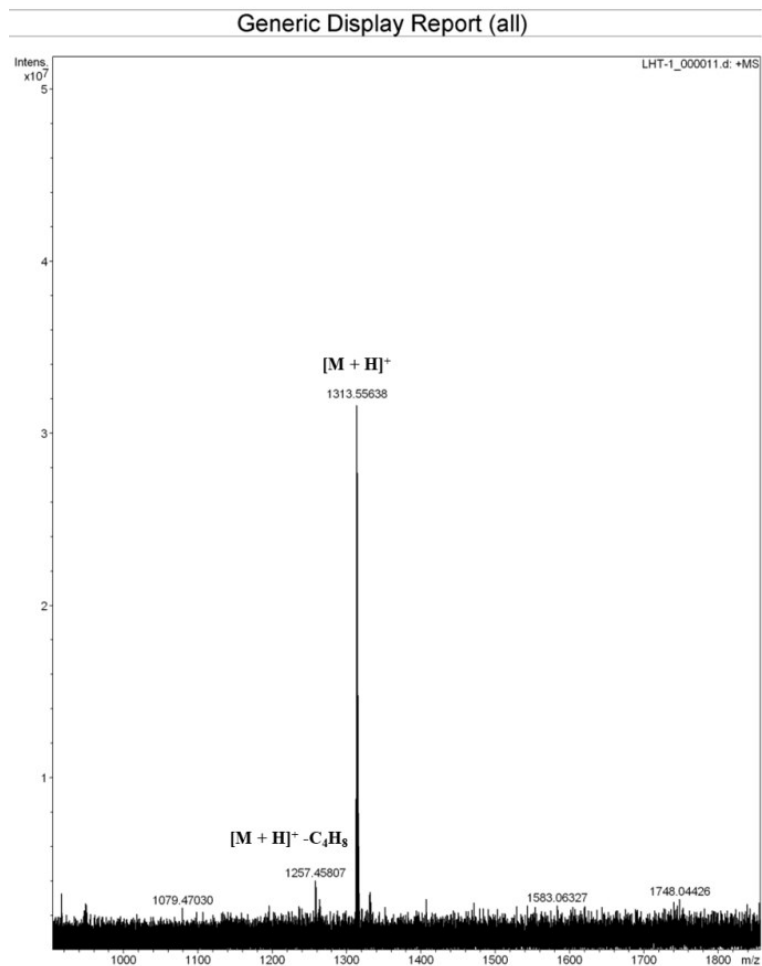

**Fig. S14** The HRMS spectrum spectrum of IDT-R.

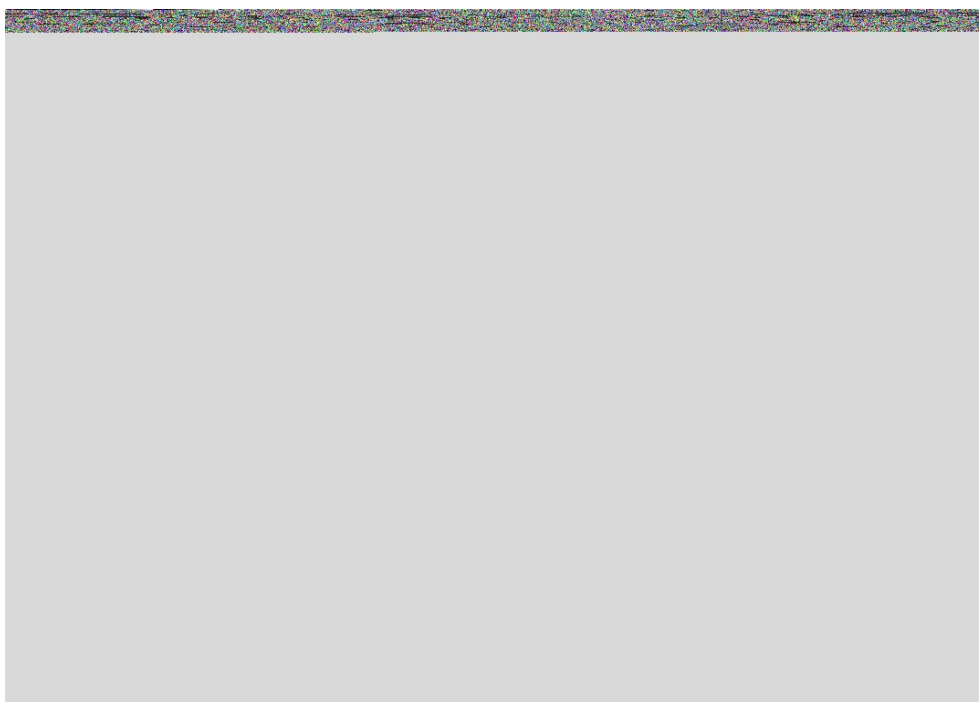

**Fig. S15** <sup>1</sup>H NMR spectrum of IDTT-R conducted in chloroform-*d*.



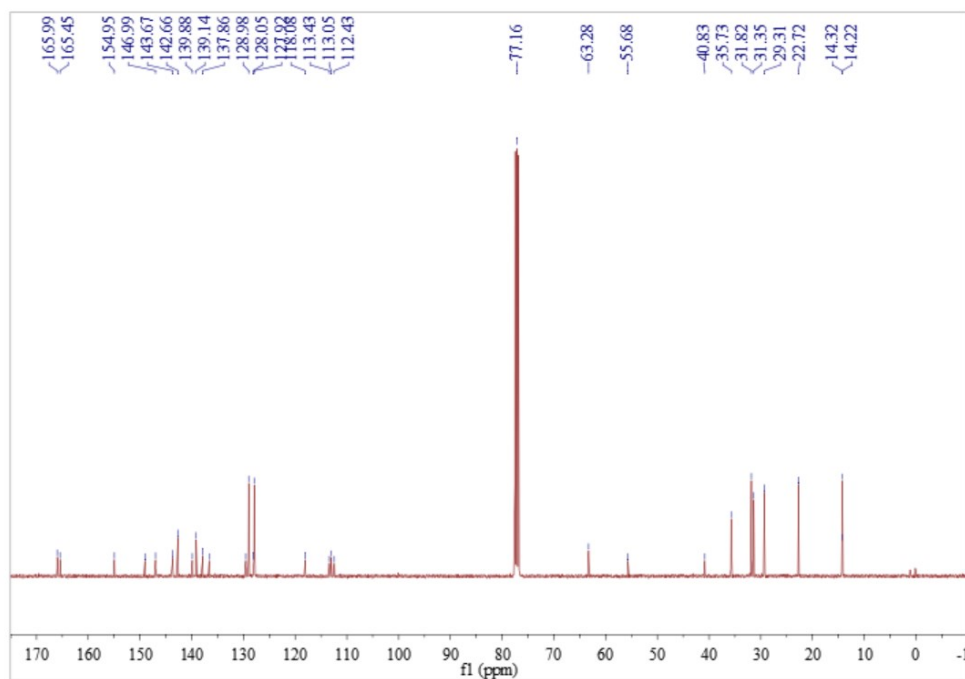

**Fig. S16**  $^{13}\text{C}$  NMR spectrum of IDTT-R conducted in chloroform-*d*.

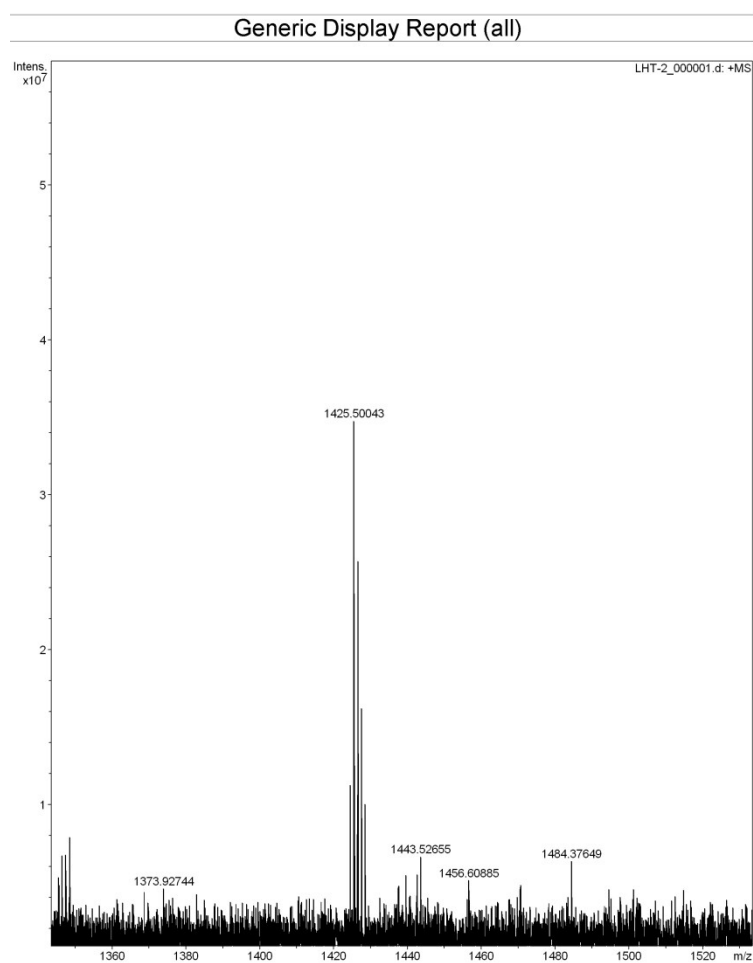

**Fig. S17** The HRMS spectrum of IDTT-R.

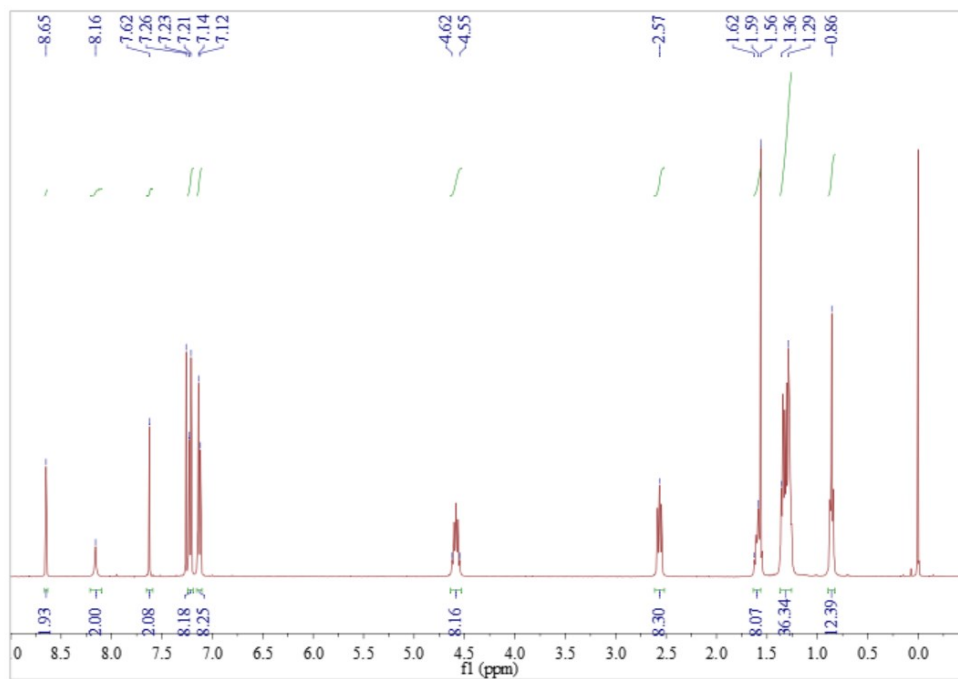

**Fig. S18**  $^1\text{H}$  NMR spectrum of IDTT-T conducted in chloroform-*d*.

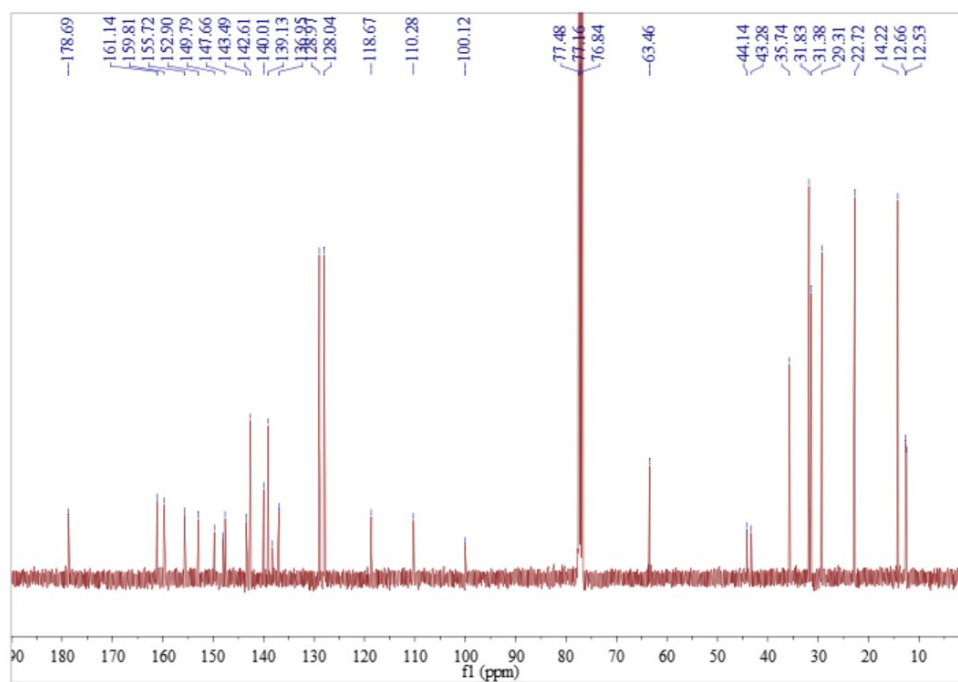

**Fig. S19**  $^{13}\text{C}$  NMR spectrum of IDTT-T conducted in chloroform-*d*.

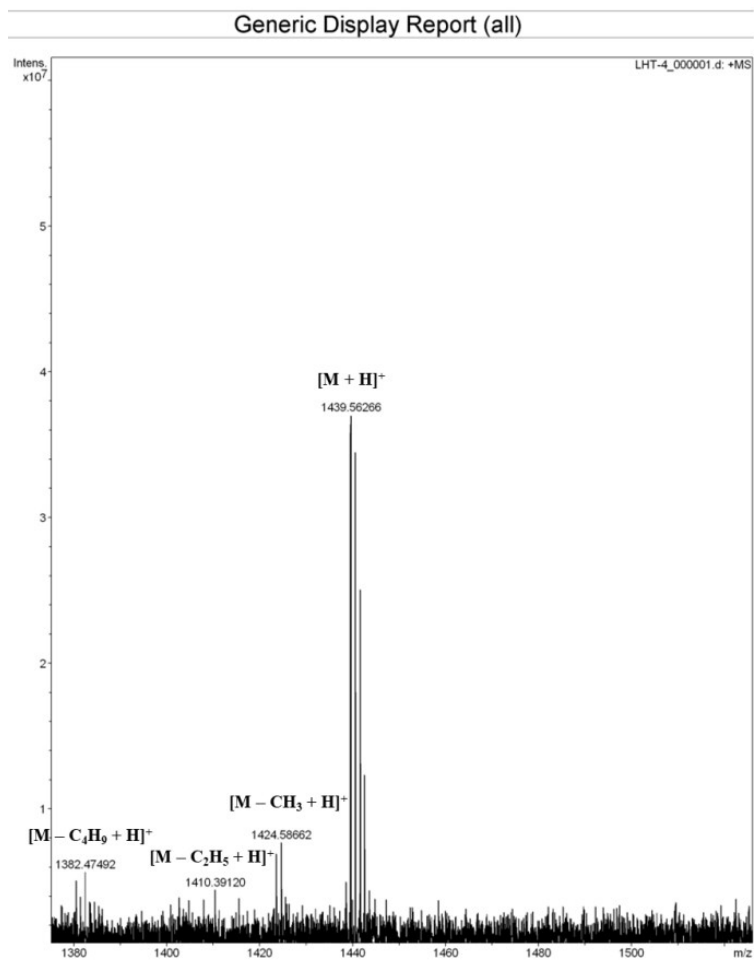

**Fig. S20** The HRMS spectrum of IDTT-T.

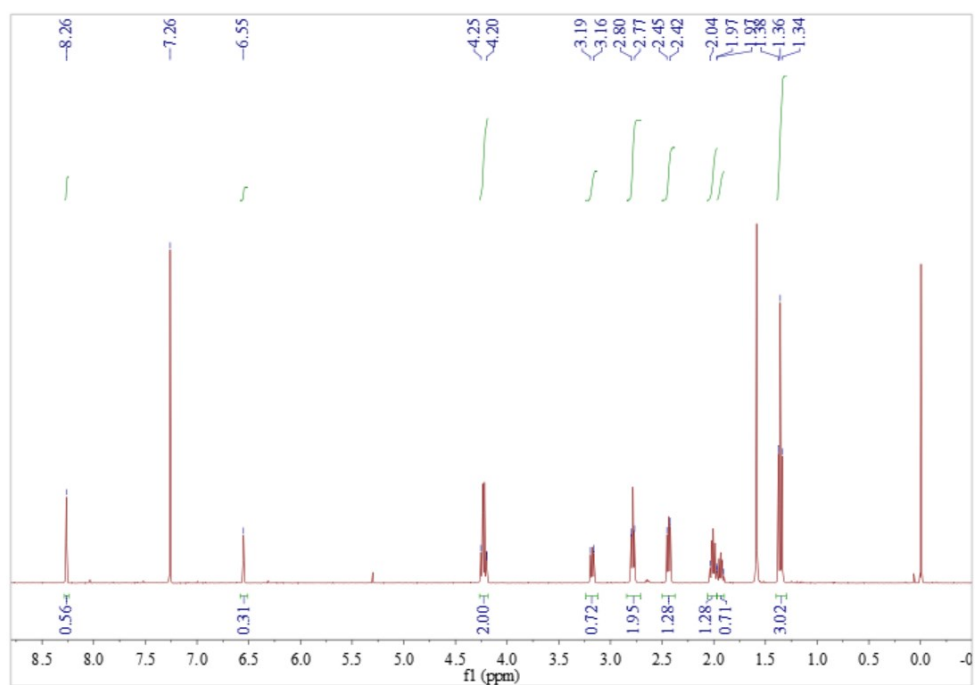

**Fig. S21**  $^1\text{H}$  NMR spectrum of BrCR conducted in chloroform- $d$ .

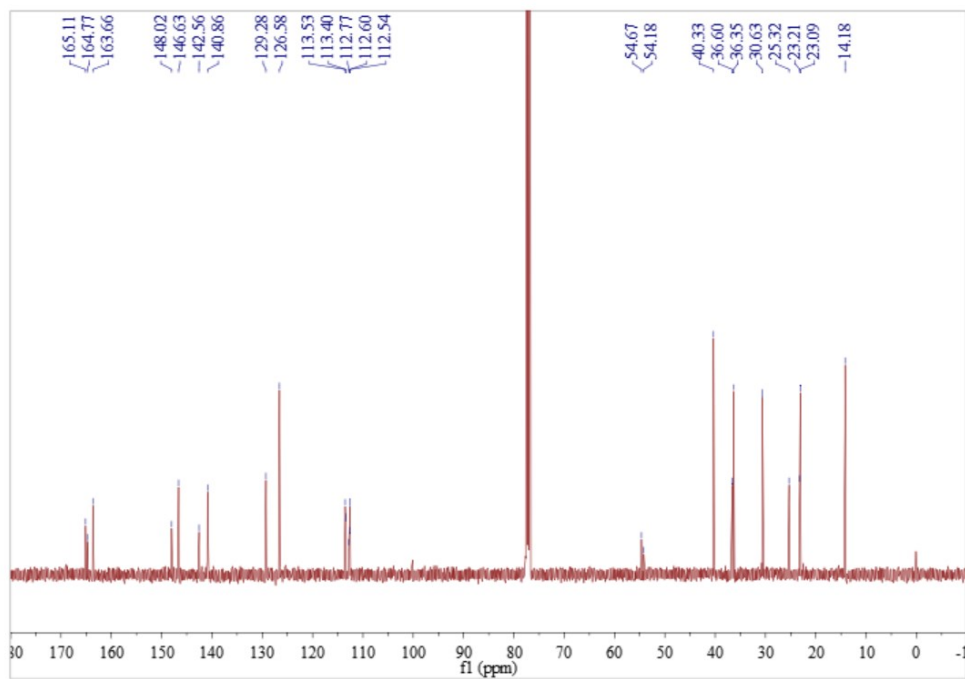

**Fig. S22** <sup>13</sup>C NMR spectrum of BrCR conducted in chloroform-*d*.

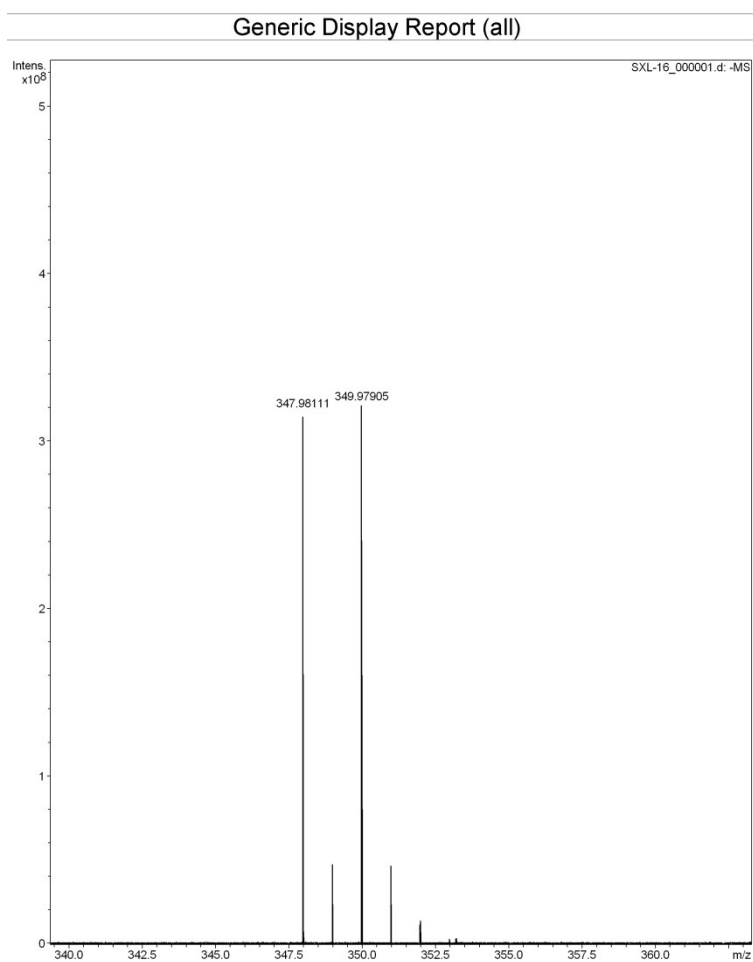

**Fig. S23** The HRMS spectrum of BrCR.

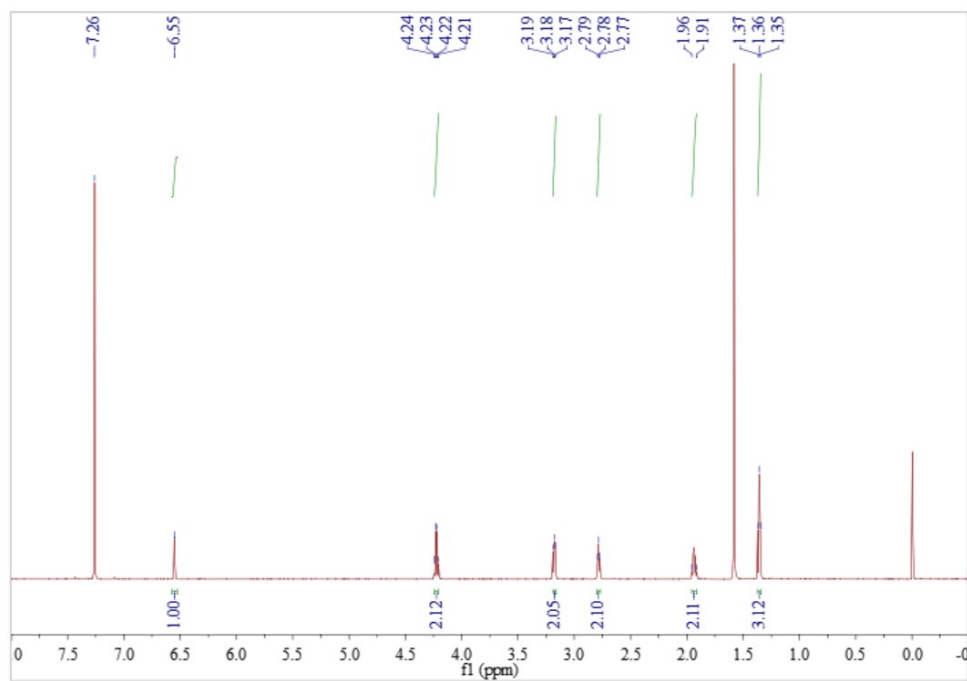

**Fig. S24** <sup>1</sup>H NMR spectrum of Z-BrCR conducted in chloroform-*d*.

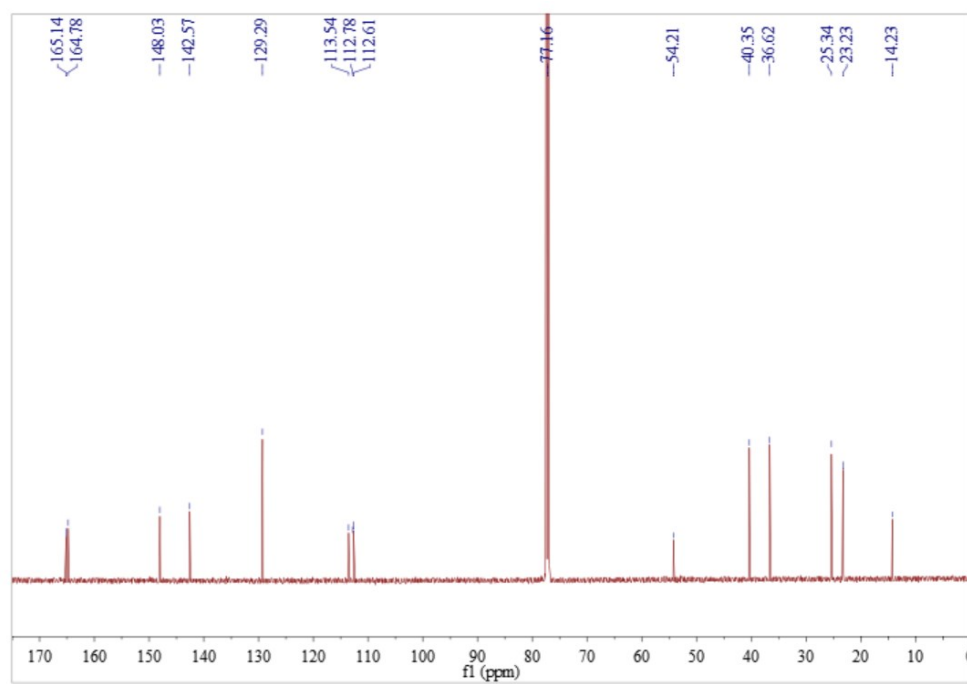

**Fig. S25** <sup>13</sup>C NMR spectrum of Z-BrCR conducted in chloroform-*d*.

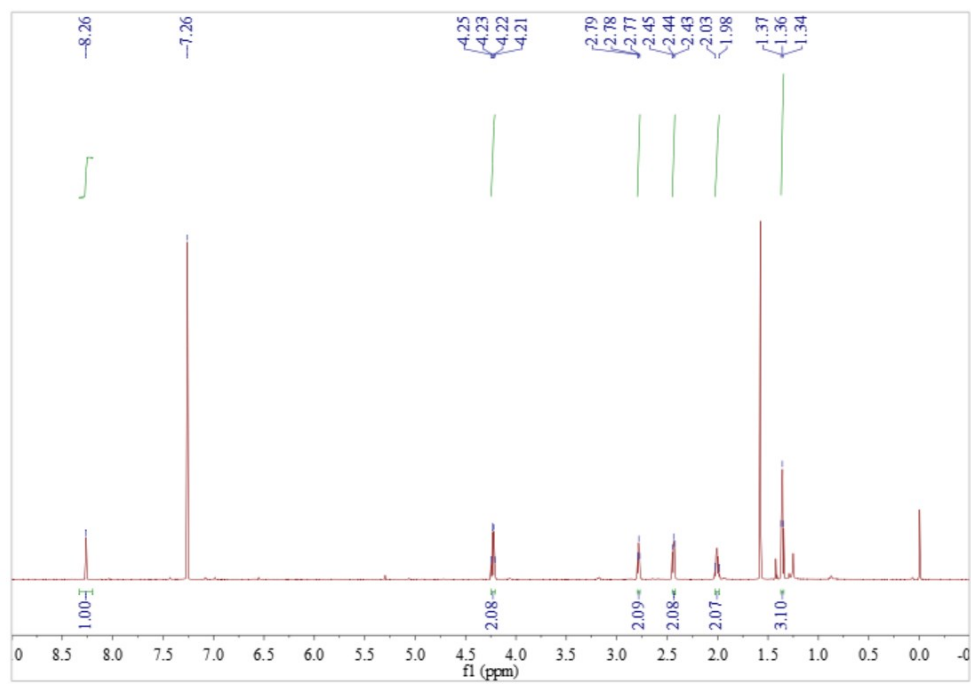

**Fig. S26** <sup>1</sup>H NMR spectrum of *E*-BrCR conducted in chloroform-*d*.

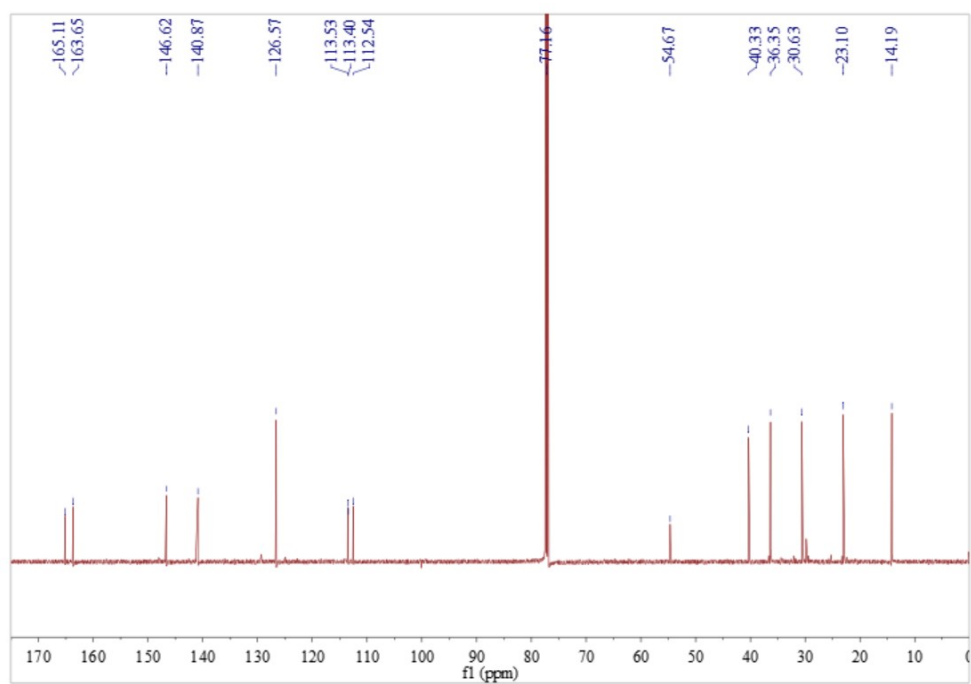

**Fig. S27** <sup>13</sup>C NMR spectrum of *E*-BrCR conducted in chloroform-*d*.

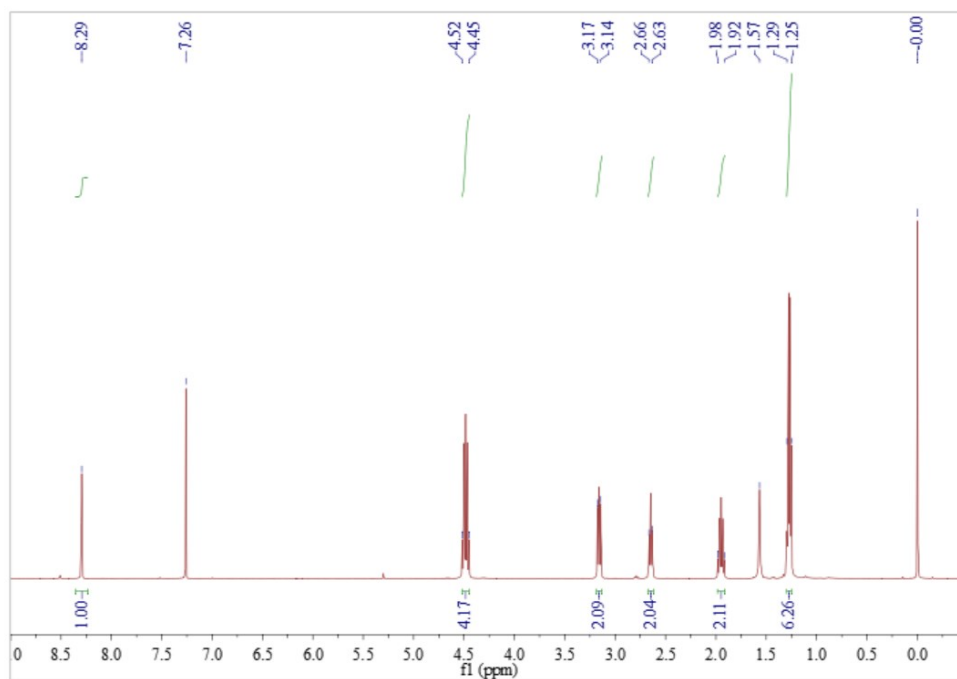

**Fig. S28** <sup>1</sup>H NMR spectrum of ClCT conducted in chloroform-*d*.

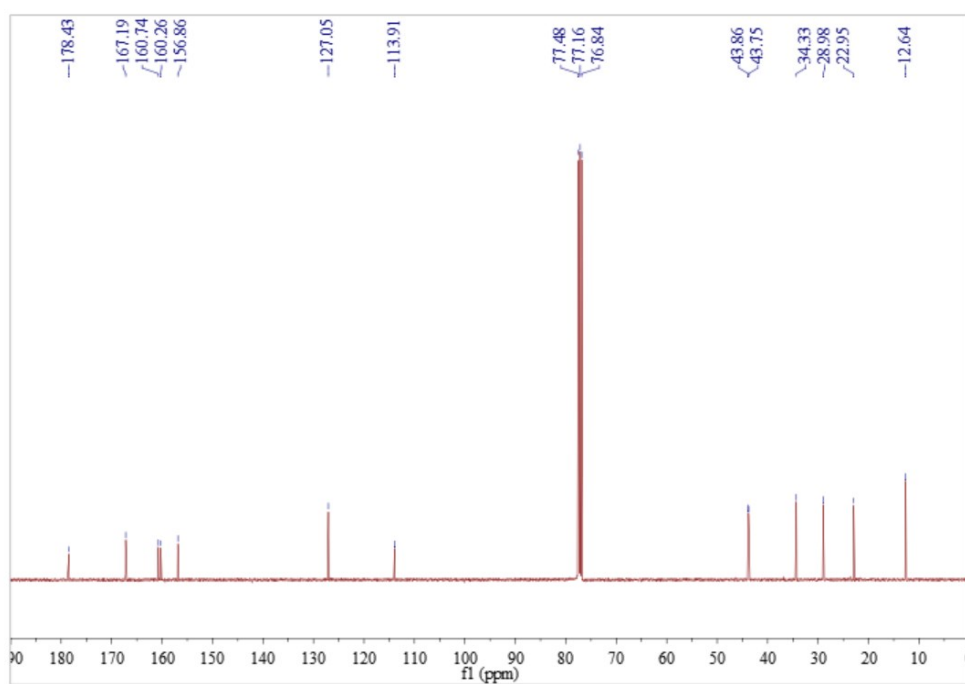

**Fig. S29** <sup>13</sup>C NMR spectrum of ClCT conducted in chloroform-*d*.

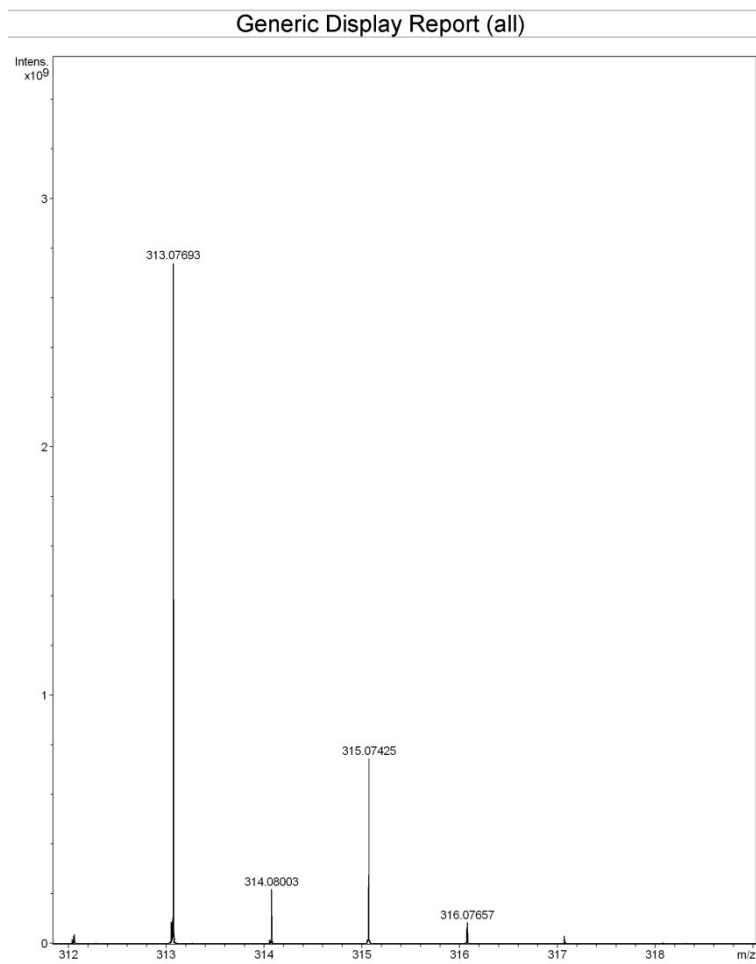

**Fig. S30** The HRMS spectrum of ClCT.

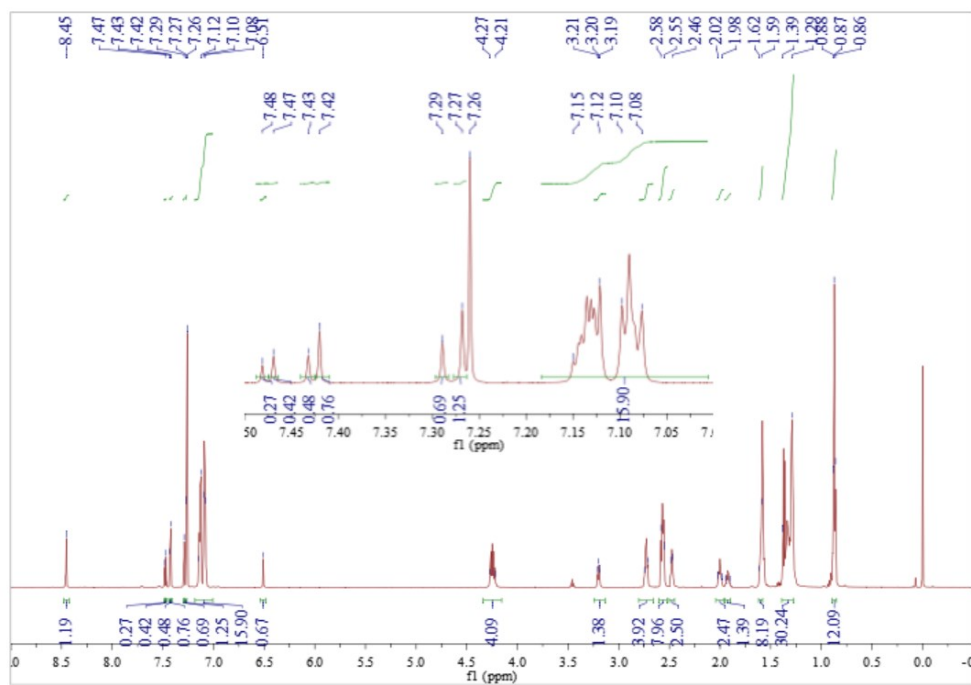

**Fig. S31**  $^1\text{H}$  NMR spectrum of IDT-CR conducted in chloroform- $d$ .



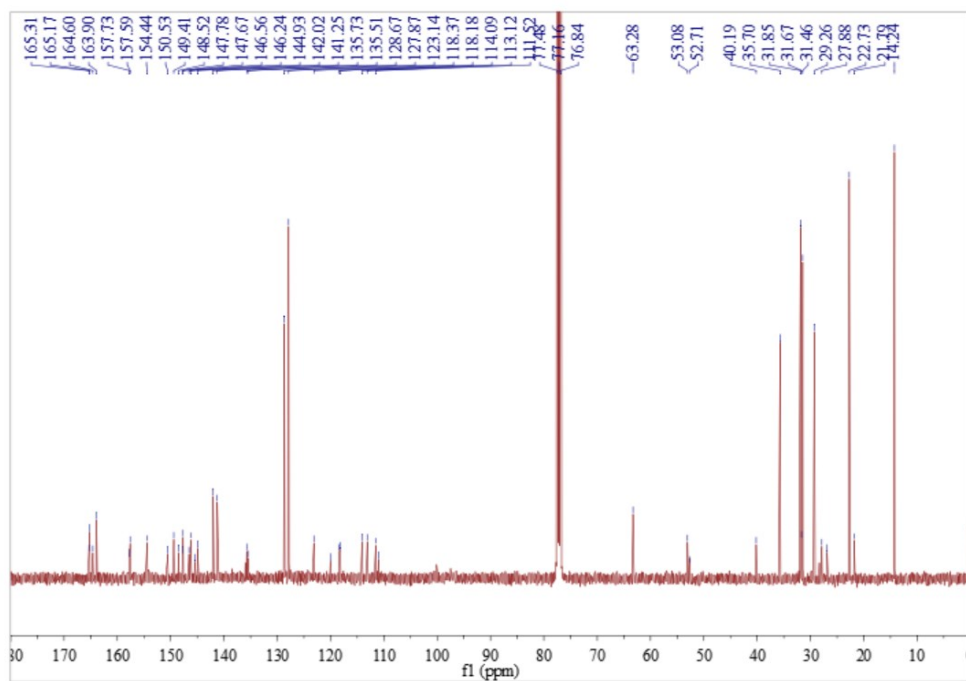

**Fig. S32**  $^{13}\text{C}$  NMR spectrum of IDT-CR conducted in chloroform-*d*.

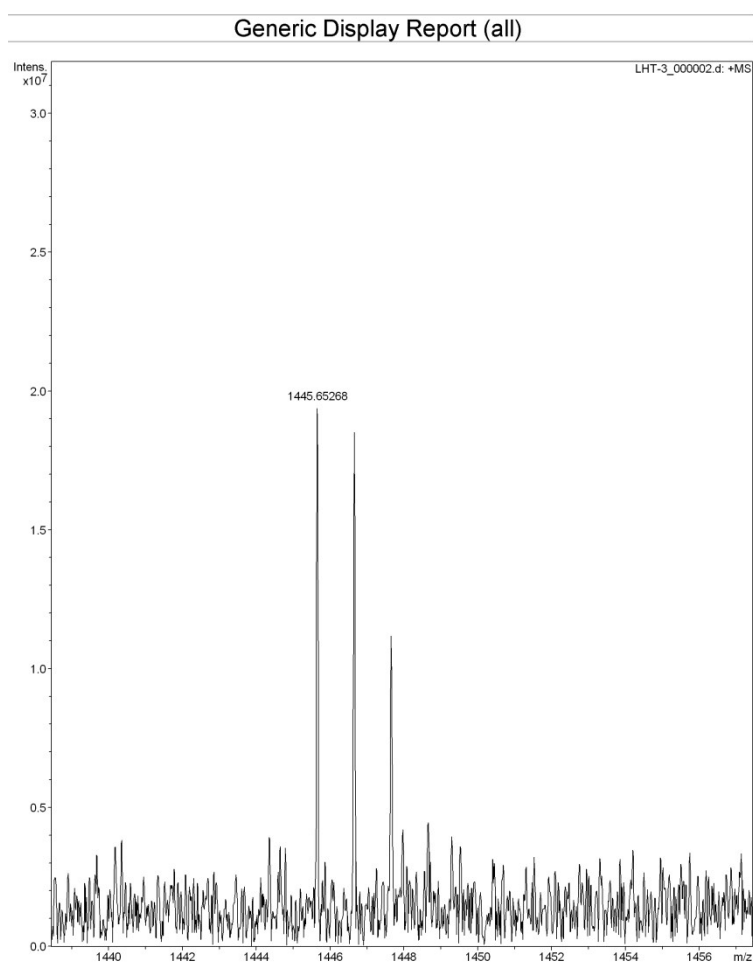

**Fig. S33** The HRMS spectrum of IDT-CR.

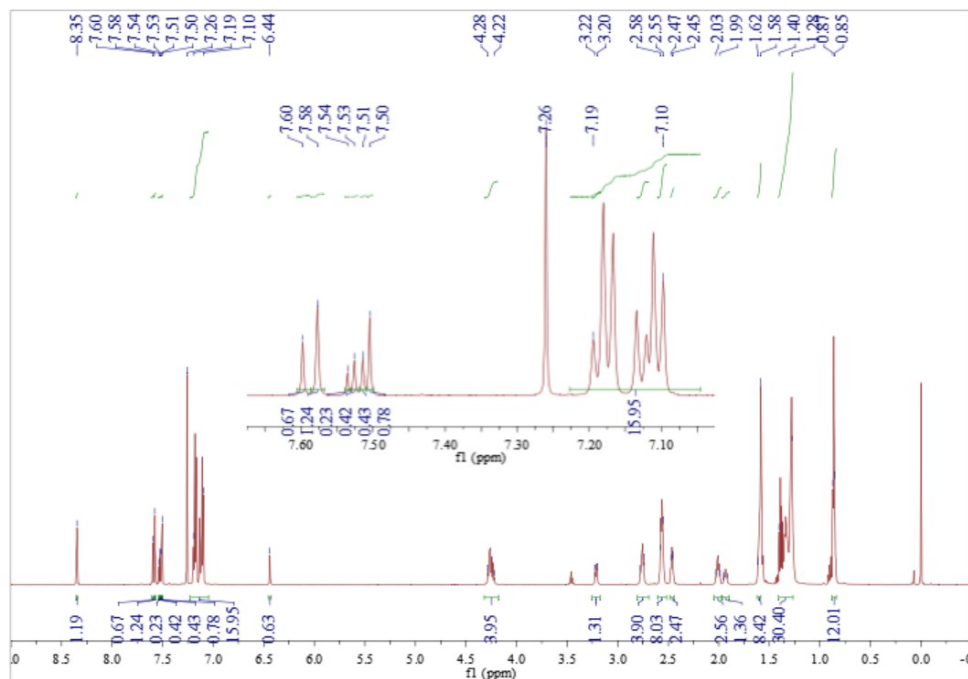

**Fig. S34** <sup>1</sup>H NMR spectrum of IDTT-CR<sup>1</sup> conducted in chloroform-*d*.

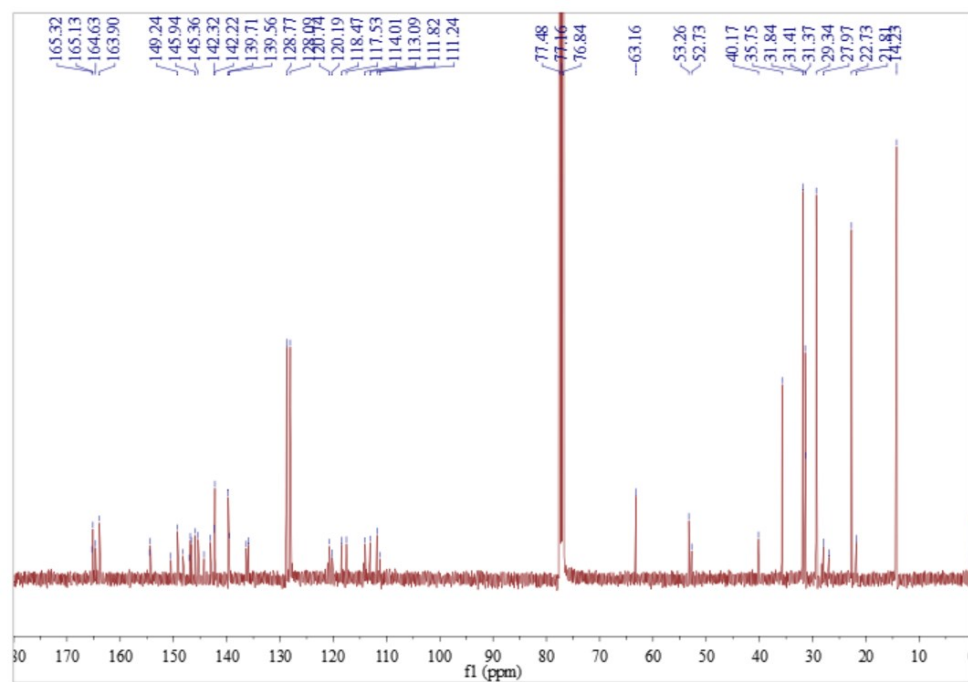

**Fig. S35** <sup>13</sup>C NMR spectrum of IDTT-CR<sup>1</sup> conducted in chloroform-*d*.

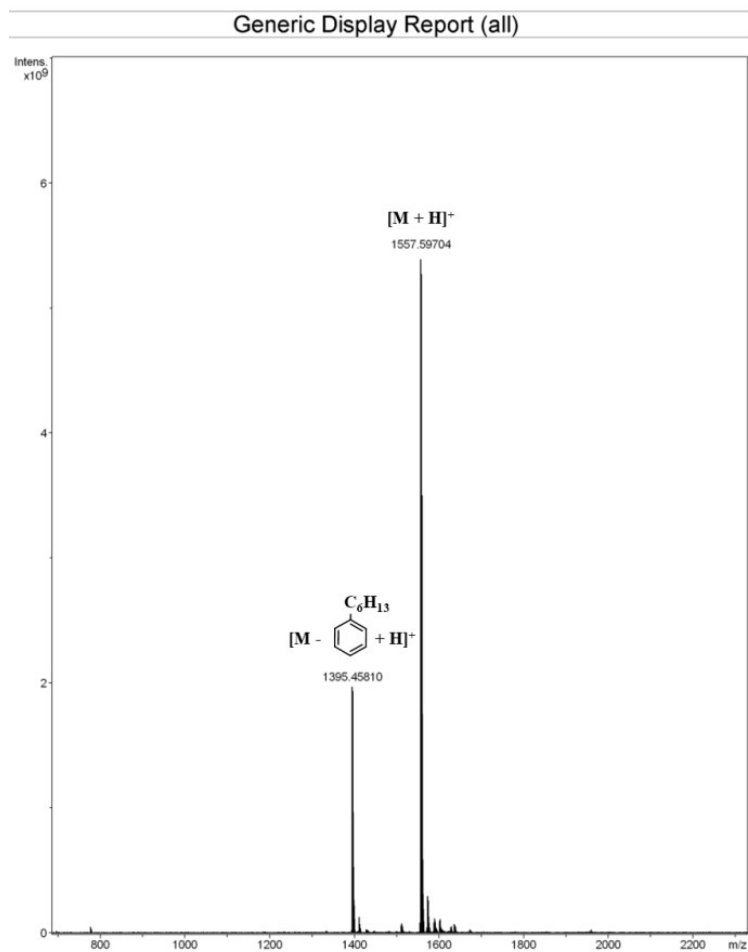

**Fig. S36** The HRMS spectrum of IDTT-CR<sup>1</sup>.

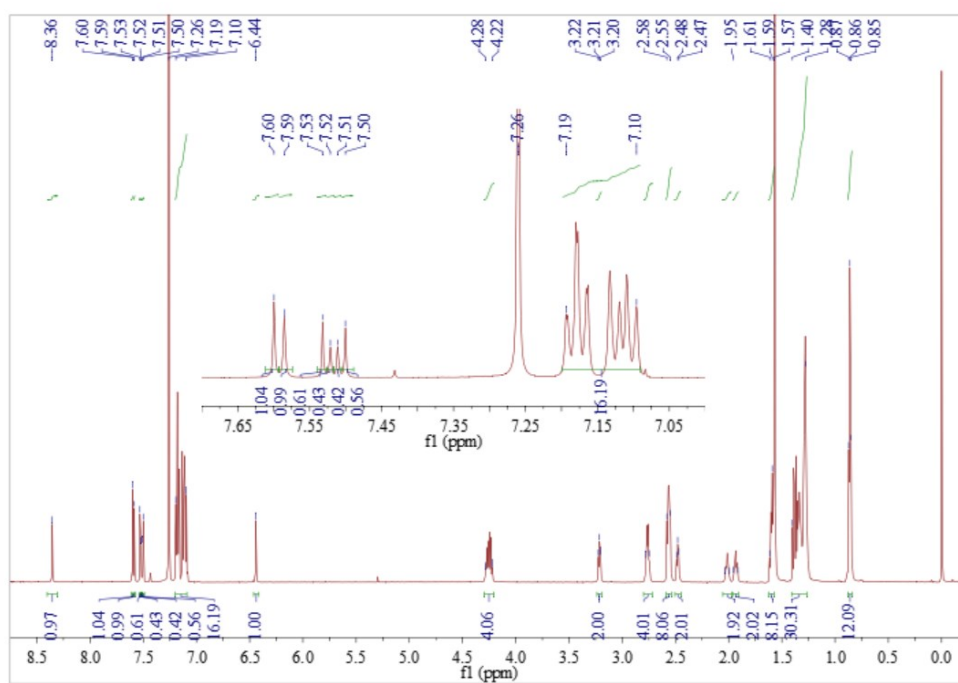

**Fig. S37** <sup>1</sup>H NMR spectrum of IDTT-CR<sup>2</sup> synthesized from pure Z-BrCR conducted in chloroform-*d*.

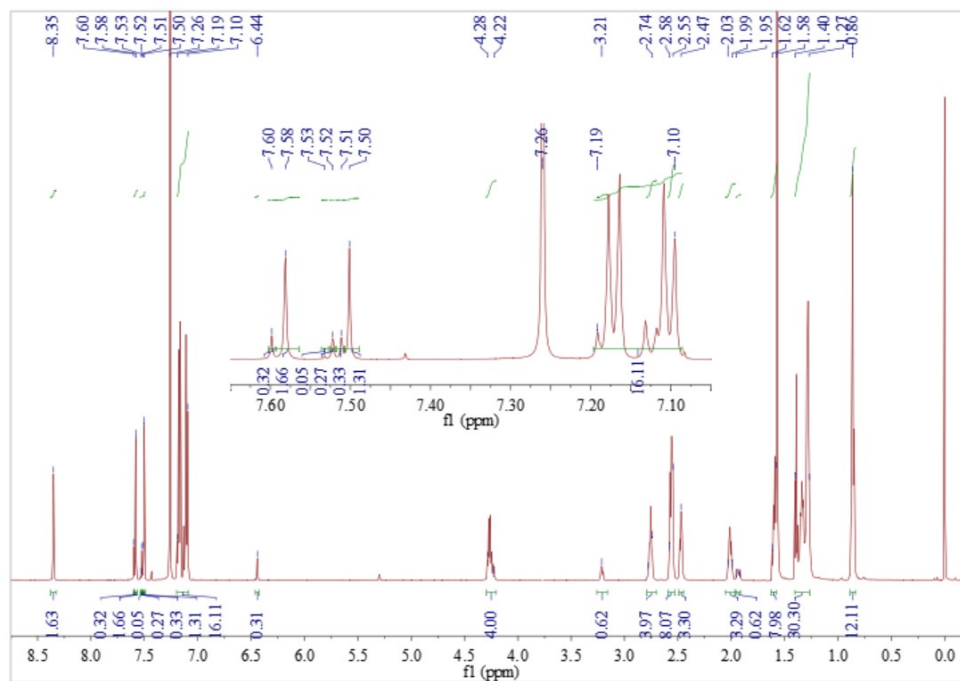

**Fig. S38**  $^1\text{H}$  NMR spectrum of IDTT- $\text{CR}^3$  synthesized from pure *E*-BrCR conducted in chloroform-*d*.

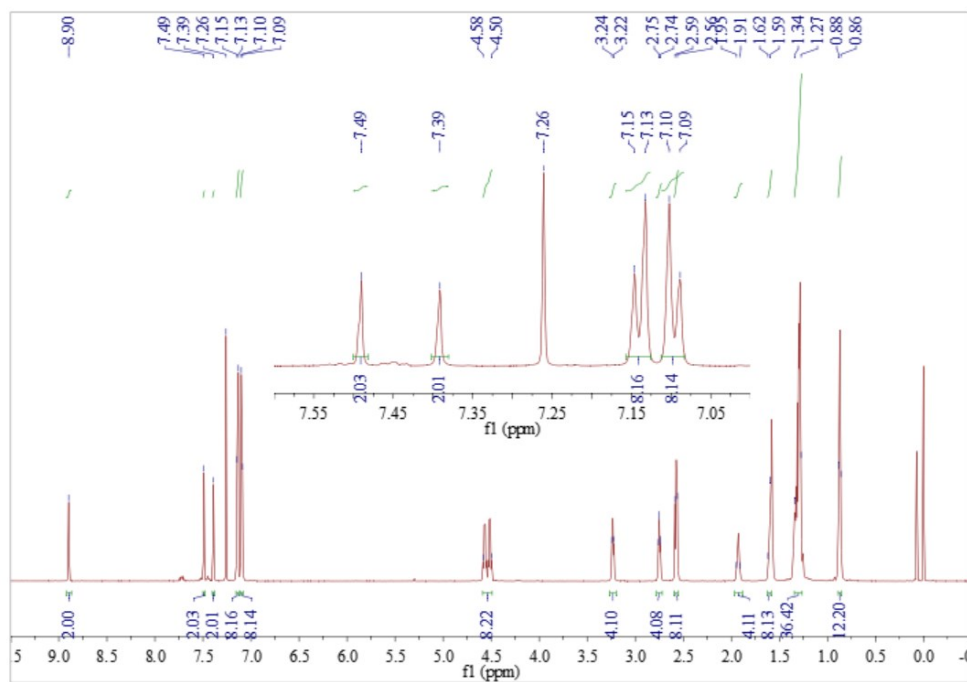

**Fig. S39**  $^1\text{H}$  NMR spectrum of IDT-CT conducted in chloroform-*d*.

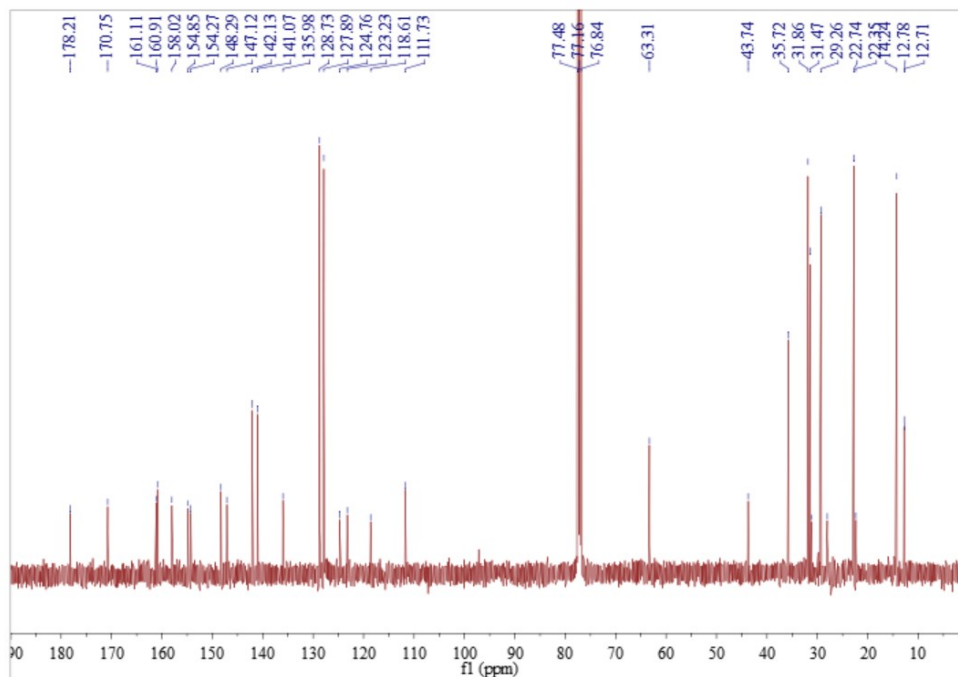

**Fig. S40**  $^{13}\text{C}$  NMR spectrum of IDT-CT conducted in chloroform-*d*.

Applied Biosystems 4700 Proteomics Analyzer 72183

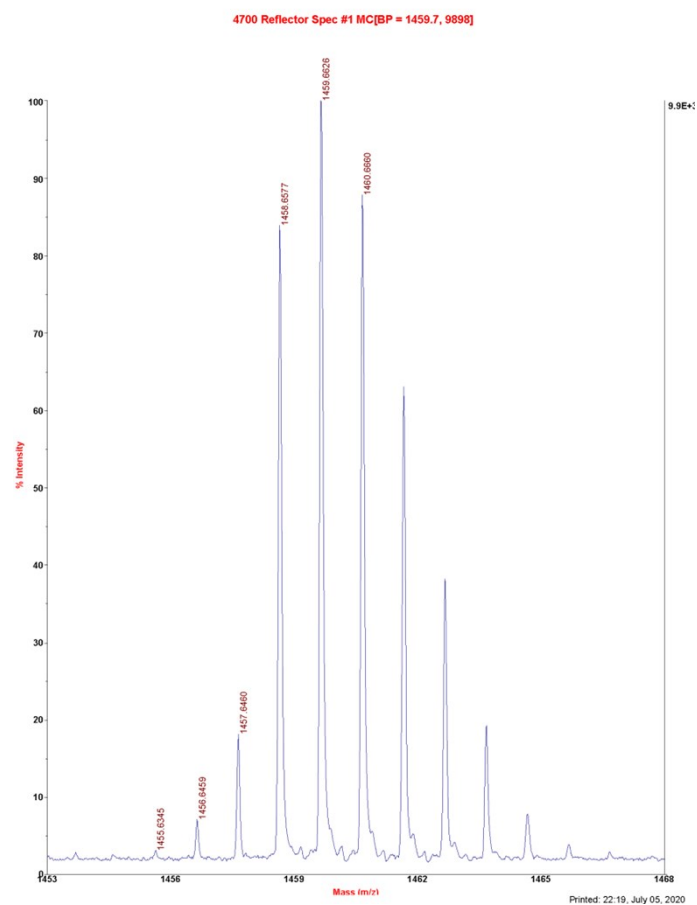

**Fig. S41** The HRMS spectrum of IDT-CT.

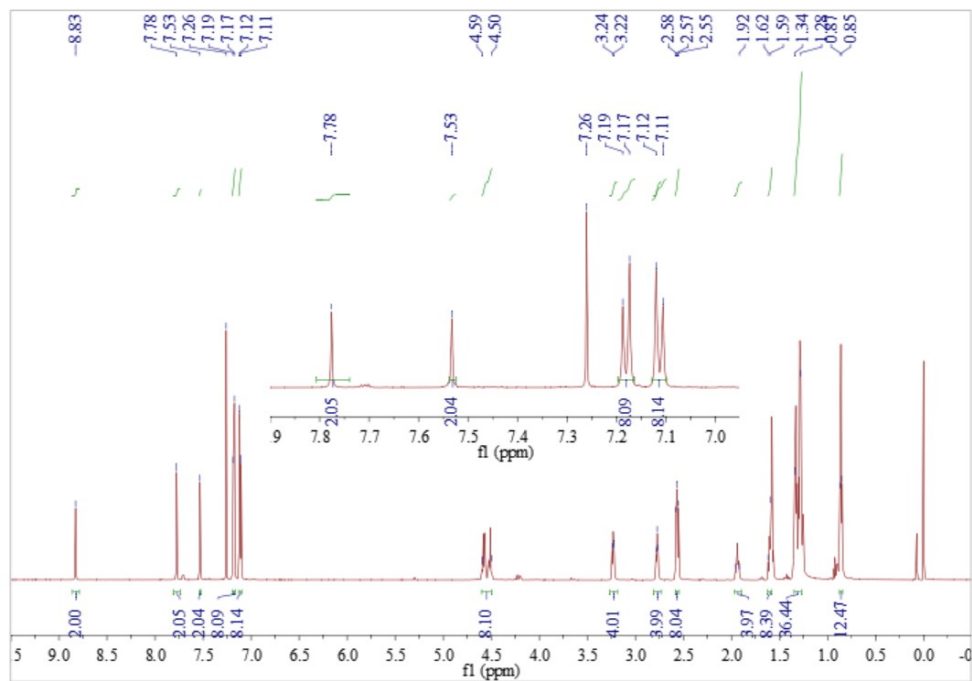

**Fig. S42** <sup>1</sup>H NMR spectrum of IDTT-CT conducted in chloroform-*d*.

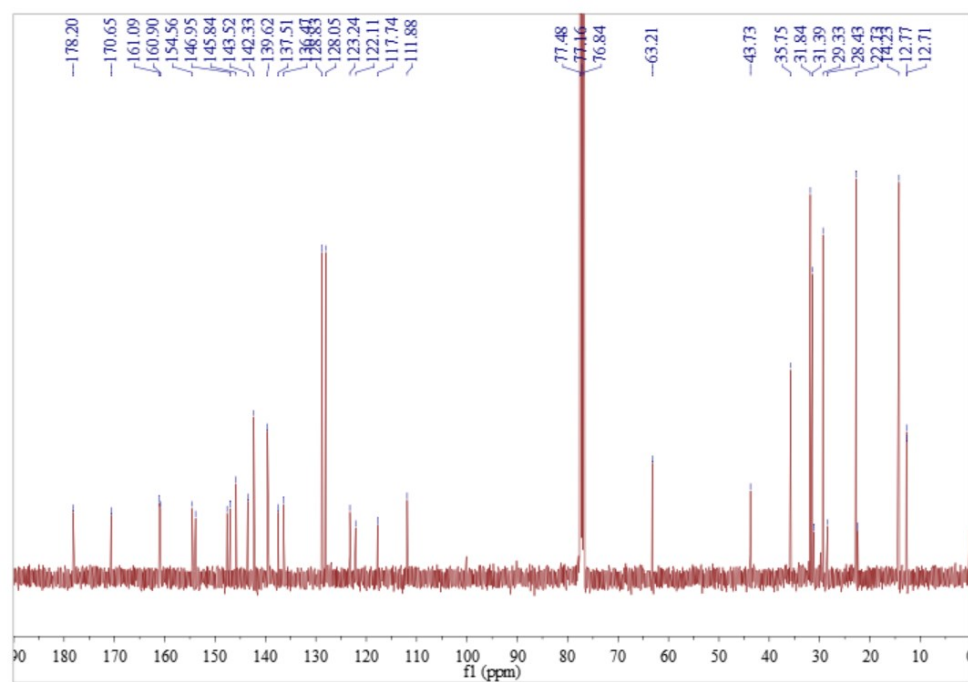

**Fig. S43** <sup>13</sup>C NMR spectrum of IDTT-CT conducted in chloroform-*d*.

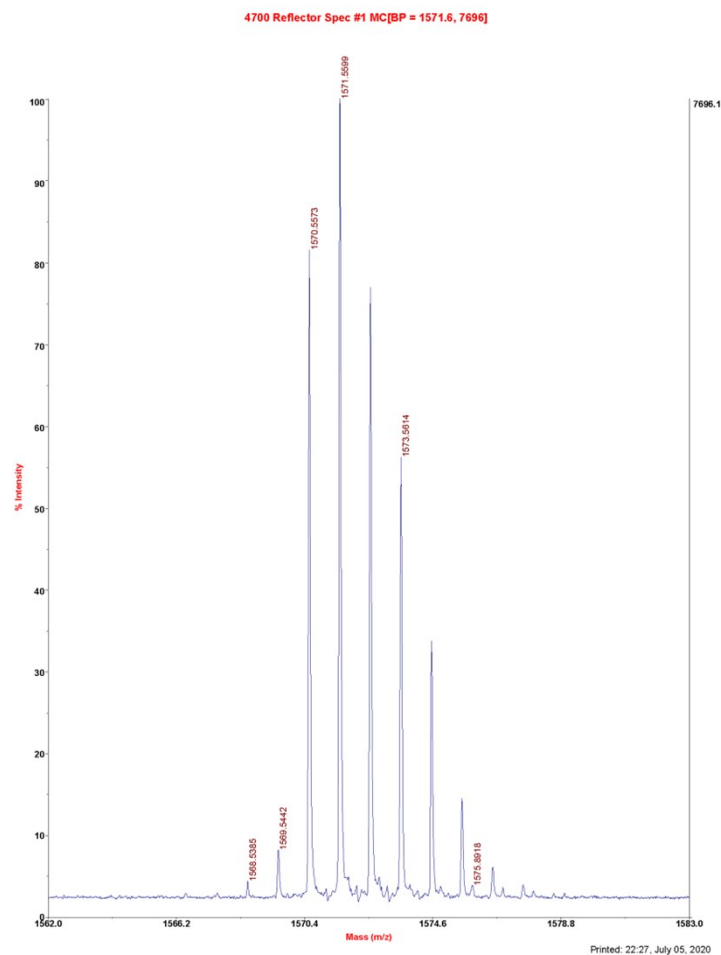

**Fig. S44** The HRMS spectrum of IDTT-CT.

## Reference

1. L. Beverina, M. Drees, A. Facchetti, M. Salamone, R. Ruffo and G. A. Pagani, *European Journal of Organic Chemistry*, 2011, **2011**, 5555-5563.
2. J. Mao, N. He, Z. Ning, Q. Zhang, F. Guo, L. Chen, W. Wu, J. Hua and H. Tian, *Angew. Chem. Int. Ed.*, 2012, **51**, 9873-9876.
3. S. R. Ramiseti, M. K. Pandey, S. Y. Lee, D. Karelia, S. Narayan, S. Amin and A. K. Sharma, *Eur. J. Med. Chem.*, 2018, **143**, 1919-1930.
4. M. Arain, R. Haynes, S. Vonwiller and T. Hambley, *Aust. J. Chem.*, 1988, **41**, 505-526.
